# Supplementary material for: Association between serum triglyceride to high-density lipoprotein cholesterol ratio and sarcopenia among elderly patients with diabetes: a secondary data analysis of the China Health and Retirement Longitudinal Study
Source: PubMed Central journal article supplement — BMJ Open. 2023 Aug 31;13(8):e075311. doi: 10.1136/bmjopen-2023-075311 (PMC10476130; doi:10.1136/bmjopen-2023-075311), 2023-08-31
Supplement: bmjopen-2023-075311.draft_revisions.pdf [file bmjopen-2023-075311.draft_revisions.pdf]

# BMJ Open

BMJ Open is committed to open peer review. As part of this commitment we make the peer review history of every article we publish publicly available.

When an article is published we post the peer reviewers' comments and the authors' responses online. We also post the versions of the paper that were used during peer review. These are the versions that the peer review comments apply to.

The versions of the paper that follow are the versions that were submitted during the peer review process. They are not the versions of record or the final published versions. They should not be cited or distributed as the published version of this manuscript.

BMJ Open is an open access journal and the full, final, typeset and author-corrected version of record of the manuscript is available on our site with no access controls, subscription charges or pay-per-view fees (<http://bmjopen.bmj.com>).

If you have any questions on BMJ Open's open peer review process please email [info.bmjopen@bmj.com](mailto:info.bmjopen@bmj.com)

# BMJ Open

## Association between serum triglyceride to high-density lipoprotein cholesterol ratio and sarcopenia among elderly patients with diabetes: Findings from the China Health and Retirement Longitudinal Study

|                               |                                                                                                                                                                                                                                            |
|-------------------------------|--------------------------------------------------------------------------------------------------------------------------------------------------------------------------------------------------------------------------------------------|
| Journal:                      | <i>BMJ Open</i>                                                                                                                                                                                                                            |
| Manuscript ID                 | bmjopen-2023-075311                                                                                                                                                                                                                        |
| Article Type:                 | Original research                                                                                                                                                                                                                          |
| Date Submitted by the Author: | 04-May-2023                                                                                                                                                                                                                                |
| Complete List of Authors:     | Lin, Yinghe; Guangzhou Panyu Central Hospital, Department of Endocrinology<br>Zhong, Shanshan; Guangzhou Panyu Central Hospital, Department of Endocrinology<br>Sun, Zhihua; Guangzhou Panyu Central Hospital, Department of Endocrinology |
| Keywords:                     | Lipid disorders < DIABETES & ENDOCRINOLOGY, Diabetes & endocrinology < INTERNAL MEDICINE, DIABETES & ENDOCRINOLOGY                                                                                                                         |
|                               |                                                                                                                                                                                                                                            |

SCHOLARONE™  
Manuscripts

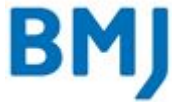

I, the Submitting Author has the right to grant and does grant on behalf of all authors of the Work (as defined in the below author licence), an exclusive licence and/or a non-exclusive licence for contributions from authors who are: i) UK Crown employees; ii) where BMJ has agreed a CC-BY licence shall apply, and/or iii) in accordance with the terms applicable for US Federal Government officers or employees acting as part of their official duties; on a worldwide, perpetual, irrevocable, royalty-free basis to BMJ Publishing Group Ltd ("BMJ") its licensees and where the relevant Journal is co-owned by BMJ to the co-owners of the Journal, to publish the Work in this journal and any other BMJ products and to exploit all rights, as set out in our [licence](#).

The Submitting Author accepts and understands that any supply made under these terms is made by BMJ to the Submitting Author unless you are acting as an employee on behalf of your employer or a postgraduate student of an affiliated institution which is paying any applicable article publishing charge ("APC") for Open Access articles. Where the Submitting Author wishes to make the Work available on an Open Access basis (and intends to pay the relevant APC), the terms of reuse of such Open Access shall be governed by a Creative Commons licence – details of these licences and which [Creative Commons](#) licence will apply to this Work are set out in our licence referred to above.

Other than as permitted in any relevant BMJ Author's Self Archiving Policies, I confirm this Work has not been accepted for publication elsewhere, is not being considered for publication elsewhere and does not duplicate material already published. I confirm all authors consent to publication of this Work and authorise the granting of this licence.

1  
2  
3  
4  
5  
6  
7  
8  
9  
10  
11  
12  
13  
14  
15  
16  
17  
18  
19  
20  
21  
22  
23  
24  
25  
26  
27  
28  
29  
30  
31  
32  
33  
34  
35  
36  
37  
38  
39  
40  
41  
42  
43  
44  
45  
46  
47  
48  
49  
50  
51  
52  
53  
54  
55  
56  
57  
58  
59  
60

1 **Title Page**

2 **Article Title:** Association between serum triglyceride to high-density lipoprotein  
3 cholesterol ratio and sarcopenia among elderly patients with diabetes: Findings from  
4 the China Health and Retirement Longitudinal Study

5  
6 **Authors:** Yinghe Lin<sup>1†\*</sup>, Shanshan Zhong<sup>1†</sup>, Zhihua Sun<sup>1\*</sup>

7 1.Department of Endocrinology, Panyu Central Hospital, Guangzhou, China.

8 †These authors share first authorship.

9 \* Correspondence:

10 Yinghe Lin:linyinghe0714@qq.com

11 Zhihua Sun:sunzhihua2002@126.com

1  
2  
3  
4 18 **Abstract**  
5  
6  
7

8 19 **Objective:** Previous studies showed an inconsistent association between the serum  
9  
10 20 triglyceride to high-density lipoprotein cholesterol (TG/HDL-C) ratio and the  
11  
12 21 occurrence of sarcopenia in different populations. This study aimed to investigate the  
13  
14 22 potential association between TG/HDL-C ratio and sarcopenia among elderly patients  
15  
16 23 with diabetes.  
17  
18  
19  
20  
21

22 24 **Design:** A cross-sectional study.  
23  
24

25 25 **Setting:** This was a second analysis of the China Health and Retirement Longitudinal  
26  
27 26 Study (CHARLS).  
28  
29  
30

31 27 **Participants:** In this study, 752 elderly individuals with diabetes were included after  
32  
33 28 removing individuals younger than 60 years old, missing values for the assessment of  
34  
35 29 sarcopenia, and missing measurements for plasma glucose or HbA1c.  
36  
37  
38  
39

40 30 **Outcome measures:** The primary information included TG/HDL-C ratio, muscle  
41  
42 31 strength, physical performance, muscle mass, and covariables. Ordinal logistic  
43  
44 32 regression and linear regression analysis were used to determine the association  
45  
46 33 between TG/HDL-C ratio and sarcopenia.  
47  
48  
49  
50

51 34 **Results:** Multivariate ordinal logistic regression showed that compared with male  
52  
53 35 patients with the lowest quartile of TG/HDL-C ratio ( $\leq 1.41$ ), those with the highest  
54  
55 36 quartile ( $> 4.71$ ; OR 0.24, 95% CI 0.10 to 0.54) were associated with lower risk of  
56  
57 37 more severe sarcopenia; compared with female patients with the lowest quartile of  
58  
59  
60

1  
2  
3  
4 38 TG/HDL-C ratio ( $\leq 2.07$ ), those with the highest quartile ( $> 5.61$ ; OR 0.17, 95% CI  
5  
6  
7 39 0.07 to 0.44) were associated with reduced risk of more severe sarcopenia. In  
8  
9 40 multivariate linear regression, male patients with the highest quartile of TG/HDL-C  
10  
11 41 ratio ( $> 4.71$ ;  $\beta = 0.36$ , 95% CI 0.20 to 0.51) had higher muscle mass than those with  
12  
13 42 the lowest quartile ( $\leq 1.41$ ); female patients with the highest quartile of TG/HDL-C  
14  
15 43 ratio ( $> 5.61$ ;  $\beta = 0.31$ , 95% CI 0.10 to 0.51) had higher muscle mass than those with  
16  
17 44 the lowest quartile ( $\leq 2.07$ ).  
18  
19  
20  
21  
22

23 45 **Conclusions:** There was a negative association between TG/HDL-C ratio categorized  
24  
25 46 by quartile and sarcopenia, which means that the higher TG/HDL-C ratio may be  
26  
27 47 related to better muscle status.  
28  
29  
30  
31

32 48 **Keywords:** sarcopenia; triglyceride; high-density lipoprotein cholesterol; diabetes;  
33  
34 49 elderly patient.  
35  
36  
37  
38  
39  
40  
41  
42  
43  
44  
45  
46  
47  
48  
49  
50  
51  
52  
53  
54  
55  
56  
57  
58  
59  
60

1  
2  
3  
4 57 **Strengths and limitations of this study**  
5  
6  
7

8 58 **1.** Our study focused on the correlation between lipid profiles and sarcopenia in  
9  
10 59 elderly patients with diabetes and analyzed the correlation between lipid profiles and  
11  
12  
13 60 different muscle statuses (muscle strength, physical performance, and muscle mass).  
14  
15

16 61 **2.** Unlike previous studies, this study focused on elderly patients with diabetes from  
17  
18  
19 62 China, a supplement to existing studies' populations and conclusions.  
20  
21

22 63 **3.** This cross-sectional study was without longitudinal evidence, and analysis of  
23  
24  
25 64 causality and mechanism.  
26  
27

28  
29 65 **4.** In this study, the type of diabetes was uncertain because the diagnosis of diabetes  
30  
31  
32 66 was based on self-report, and measurement of blood glucose and HbA1c.  
33  
34

35 67 **5.** The lack of duplicate blood lipid tests led to measurement bias in the baseline data.  
36  
37  
38  
39 68  
40  
41  
42 69  
43  
44  
45  
46 70  
47  
48  
49 71  
50  
51  
52  
53 72  
54  
55  
56 73  
57  
58  
59  
60

## 74 1. Introduction

75 Sarcopenia is a syndrome characterized by age-related loss of muscle mass, plus low  
76 muscle strength and/or inadequate physical performance [1], increasing the risk for  
77 multiple adverse outcomes, including falls, physical limitations, frailty,  
78 hospitalization, and mortality [2-7]. In a previous study, the prevalence of sarcopenia  
79 was 1–29% in community-dwelling populations and 14–33% in people requiring  
80 long-term care [8]. Recently, various working groups have updated different  
81 consensus to identify sarcopenia based on the combination of loss of muscle strength,  
82 function, and mass [1,4]. However, in routine clinical practice, most clinicians remain  
83 to ignore the condition and are unaware of its diagnostic strategies [3,9].

84 Diabetes mellitus and sarcopenia have a bidirectional relationship [10,11]. In elderly  
85 patients with diabetes, exercise capacity decline has been recognized as a new  
86 complication [12]. Conversely, sarcopenia may increase the likelihood of older people  
87 developing diabetes [10]. Older age, lower body mass index (BMI), and other  
88 microvascular complications in patients with diabetes were significantly associated  
89 with the development of sarcopenia [13]. A significant association between  
90 sarcopenia and some metabolic risk markers, such as higher fasting plasma glucose  
91 (FPG) and glycated hemoglobin (HbA1c) in diabetes individuals, has been reported  
92 [14,15].

93 Serum triglyceride to high-density lipoprotein cholesterol ratio (TG/HDL-C) is a  
94 combination of lipid metabolic indicator that has been considered as cardiovascular



1  
2  
3  
4 95 diseases risk prediction in patients with or without diabetes [16-19]. In addition, as an  
5  
6  
7 96 accessible serum lipid test in standard clinical practice, TG/HDL-C ratio has shown  
8  
9  
10 97 an inconsistent association with the occurrence of sarcopenia in elderly Korean men  
11  
12 98 and community-dwelling Chinese adults [20,21]. In consequence, whether the  
13  
14  
15 99 relevant conclusion can be extrapolated to elderly patients with diabetes is uncertain.

16  
17  
18 100 Therefore, in this study, we aimed to investigate the potential association between  
19  
20  
21 101 TG/HDL-C ratio and sarcopenia among elderly patients with diabetes, including  
22  
23  
24 102 muscle strength, physical performance, and muscle mass.

## 103 **2. Materials and methods**

### 104 **2.1 Study population**

105 This study used data from the China Health and Retirement Longitudinal Study  
106 (CHARLS), an ongoing nationally representative survey of middle-aged and elderly  
107 individuals in China. Detailed information on the CHARLS was published elsewhere  
108 [22]. Briefly, the CHARLS collects high-quality data through face-to-face interviews  
109 with a structured questionnaire from a nationally representative sample of the Chinese  
110 population aged 45 years and over, selected using multistage stratified  
111 probability-proportionate-to-size sampling. The survey mainly covered  
112 sociodemographics, lifestyle factors, and health-related information. Besides, the  
113 CHARLS included multiple physical measurements and blood sample collection. The  
114 baseline survey was conducted in 2011, and all participants were followed up every 2  
115 to 3 years. Each follow-up survey remained to increase new participants.

1  
2  
3  
4 116 The CHARLS protocol was conducted following the Declaration of Helsinki and  
5  
6  
7 117 approved by the Biomedical Ethical Review Committee of Peking University  
8  
9 118 (IRB00001052-11015). All participants provided informed consent. The CHARLS  
10  
11  
12 119 datasets are available on request from their home page at <http://charls.pku.edu.cn/>.

13  
14  
15 120 Our group selected the baseline participants in CHARLS 2011 (n=17,708) and  
16  
17  
18 121 non-repetitive participants in CHARLS 2015 (n=3823). We gradually excluded  
19  
20  
21 122 20,779 individuals due to (1) age <60 years (n=13,661), (2) no information on  
22  
23  
24 123 physical measurements required for the assessment of sarcopenia (n=2024), (3)  
25  
26 124 non-diabetes patients, or missing plasma glucose or HbA1c measurements (n=5094).  
27  
28  
29 125 Finally, 752 participants were eligible for the cross-sectional analysis.

30  
31  
32 126 In this study, diabetes was defined as FPG  $\geq 7.0$  mmol/L (126 mg/dL), random plasma  
33  
34  
35 127 glucose (RPG)  $\geq 11.1$  mmol/L (200 mg/dL), HbA1c  $\geq 6.5\%$  or self-reported history  
36  
37  
38 128 [23].

## 39 40 41 129 **2.2 Data collection**

42  
43  
44 130 In the CHARLS, information on demographic factors (including age and sex),  
45  
46  
47 131 residence (urban or rural), education level (less than lower secondary, upper  
48  
49  
50 132 secondary or vocational training, or tertiary), health behaviors (including the history  
51  
52  
53 133 of smoking and drinking) and diabetes management (including awareness and  
54  
55  
56 134 treatment of diabetes) were obtained by a structured questionnaire.

1  
2  
3  
4 135 The main anthropometric parameters were height and body weight in our study. The  
5  
6  
7 136 body mass index (BMI, kg/m<sup>2</sup>) was calculated as body weight/(height<sup>2</sup>), and  
8  
9  
10 137 overweight was defined as a BMI  $\geq 25$  kg/m<sup>2</sup>. Systolic blood pressure (SBP) and  
11  
12 138 diastolic blood pressure (DBP) were measured three times, and their averages were  
13  
14  
15 139 recorded.

16  
17  
18 140 The blood samples were collected for measurements of plasma glucose (mg/dL),  
19  
20  
21 141 HbA1c (%), total cholesterol (TC, mg/dL), TG, low-density lipoprotein cholesterol  
22  
23 142 (LDL-C, mg/dL), HDL-C (mg/dL), high-sensitivity C-reactive protein (hs-CRP,  
24  
25  
26 143 mg/L), uric acid (mg/dL), and creatinine (mg/dL). Serum triglyceride to high-density  
27  
28  
29 144 lipoprotein cholesterol ratio, the primary variable in this study, was calculated as  
30  
31 145 TG/HDL-C. The estimated glomerular filtration rate (eGFR, mL/min/1.73 m<sup>2</sup>) was  
32  
33  
34 146 calculated based on the Chronic Kidney Disease Epidemiology Collaboration's 2009  
35  
36 147 creatinine equation [24].

### 40 148 **2.3 Assessment of sarcopenia**

41  
42  
43 149 Sarcopenia status was assessed according to the algorithm of the Asian Working  
44  
45  
46 150 Group for Sarcopenia 2019 (AWGS 2019) in this study [1]. Participants with  
47  
48  
49 151 adequate muscle strength and physical performance were considered to have no  
50  
51  
52 152 sarcopenia. Possible sarcopenia was diagnosed if participants had sufficient muscle  
53  
54 153 mass, with low muscle strength or low physical performance. Participants were  
55  
56  
57 154 recognized as having sarcopenia when they had low muscle mass, with low muscle  
58  
59 155 strength or low physical performance.  
60

### 156 **2.3.1 Muscle strength**

157 Handgrip strength (kg) was used to assess muscle strength according to the AWGS  
158 2019 [1]. Handgrip strength was measured both with the left and right hand twice in  
159 the CHARLS [22], and we took the average of maximum values. If participants could  
160 not perform grip strength measurements in both hands, we used the data of the  
161 available hand. The AWGS 2019 recommended that the cut-off points for low  
162 handgrip strength were <28 kg in men and <18 kg in women [1].

### 163 **2.3.2 Physical performance**

164 This study measured physical performance by gait speed and 5-time chair stand test.  
165 In the CHARLS, researchers recorded the number of seconds the participants took to  
166 walk 2.5 meters [22], and we converted it to gait speed (m/s). 5-time chair stand test  
167 needed the participants to keep their arms folded across their chest, stand up straight  
168 and then sit down again five times [22], and the number of seconds they spent was  
169 recorded. According to the AWGS 2019, gait speed <1.0 m/s or 5-time chair stand  
170 test  $\geq 12$  seconds was regarded as low physical performance [1]. In our analysis,  
171 participants who tried but failed to perform either of the tests were also considered to  
172 have low physical performance.

### 173 **2.3.3 Skeletal muscle mass measurement**

1  
2  
3  
4 174 Based on the AWGS 2019, the muscle mass was estimated by the appendicular  
5  
6  
7 175 skeletal muscle mass (ASM). In this study, we used a previously validated  
8  
9  
10 176 anthropometric equation in a Chinese population to calculate the ASM [25]:

$$ASM = 0.193 \times body\ weight + 0.107 \times height - 4.157 \times sex - 0.037 \times age - 2.631$$

11  
12  
13  
14  
15 177 The body weight, height, and age were measured in kilograms, centimeters, and years,  
16  
17  
18 178 respectively. For sex, the value 1 was for men and the value 2 was for women.

19  
20  
21 179 As the parameter to assess muscle mass in our study, the height-adjusted muscle mass  
22  
23  
24 180 was calculated as the ASM divided by the square of the height in meters  
25  
26  
27 181 (ASM/height<sup>2</sup>). Following previous studies [26], the cut-off points for low muscle  
28  
29  
30 182 mass were the lowest 20% of the height-adjusted muscle mass among our study  
31  
32  
33 183 population. Finally, the ASM/height<sup>2</sup> values of <6.99 kg/m<sup>2</sup> in men and <5.24 kg/m<sup>2</sup>  
34  
35 184 in women were considered low muscle mass.

## 36 37 38 185 **2.4 Statistical analysis**

39  
40  
41 186 In this study, statistical analyses were performed based on different genders.  
42  
43  
44 187 Continuous variables with normal distribution were described as mean ± standard  
45  
46  
47 188 deviation (SD), while with non-normal distribution as median [interquartile range  
48  
49  
50 189 (IQR)]. Categorical variables are expressed as frequencies and proportions. First,  
51  
52  
53 190 differences in baseline characteristics among the three groups (no sarcopenia, possible  
54  
55  
56 191 sarcopenia, and sarcopenia) were compared using one-way ANOVA, chi-square test,  
57  
58  
59 192 Fisher's exact test, or Kruskal–Wallis test, as appropriate. Second, ordinal logistic  
60  
193 regression analysis was used to assess the association between TG/HDL-C ratio and

1  
2  
3  
4 194 sarcopenia status. Four different models were introduced: Model 1, without  
5  
6  
7 195 adjustment; Model 2, adjusted for median age; Model 3, additionally adjusted for  
8  
9  
10 196 residence, education level, and history of smoking and drinking; and Model 4,  
11  
12 197 additionally adjusted for overweight, diabetes management, SBP, DBP, plasma  
13  
14 198 glucose, HbA1c, TC, LDL-C, hs-CRP, uric acid, and eGFR. Third, linear regression  
15  
16  
17 199 analysis was used to estimate the associations between TG/HDL-C ratio and muscle  
18  
19  
20 200 strength, physical performance, and muscle mass, respectively, with or without  
21  
22 201 adjustment for covariates. The main variable was serum TG/HDL-C, categorized and  
23  
24  
25 202 analyzed according to quartile. In all cases, two-sided p values <0.05 were considered  
26  
27  
28 203 statistically significant. All analyses were carried out with Stata 17.0 (StataCorp,  
29  
30 204 College Station, TX, USA).

### 205 **3. Results**

#### 206 **3.1 Baseline**

207 Table 1 showed the baseline characteristics of male elderly patients with diabetes  
208 according to sarcopenia status in our study. There were 29 (7.9%) male participants  
209 without sarcopenia, 268 (72.8%) with possible sarcopenia, and 71 (19.3%) with  
210 sarcopenia. There were significant differences among the three groups concerning the  
211 following continuous variables: age (P<0.001), BMI (P<0.001), SBP (P=0.011), DBP  
212 (P=0.007), HbA1c (P=0.007), TC (P=0.006), TG (P=0.001), LDL-C (P=0.002),  
213 HDL-C (P<0.001), uric acid (P=0.024), and TG/HDL-C ratio (P<0.001). The levels of  
214 plasma glucose (P=0.763), hs-CRP (P=0.470), and eGFR (P=0.349) showed no

1  
2  
3  
4 215 significant difference among the different sarcopenia status. The distributions of  
5  
6  
7 216 median age ( $P=0.001$ ), residence ( $P=0.001$ ), overweight ( $P=0.349$ ), awareness of  
8  
9  
10 217 diabetes ( $P=0.038$ ), and TG/HDL-C ratio ( $P<0.001$ ) showed significant differences  
11  
12 218 among the three groups. There was no significant difference among the classifications  
13  
14  
15 219 of sarcopenia with respect to the proportions of education level ( $P=0.119$ ), treatment  
16  
17 220 of diabetes ( $P=0.072$ ), and history of smoking ( $P=0.384$ ) and drinking ( $P=0.099$ ).

18  
19  
20  
21 221 The baseline characteristics of female elderly patients with diabetes were presented in  
22  
23 222 Table 2 according to sarcopenia status. In this study, 20 (5.2%) female participants  
24  
25  
26 223 were defined as having no sarcopenia, 289 (75.3%) as possible sarcopenia, and 75  
27  
28 224 (19.5%) as sarcopenia. The levels of age ( $P<0.001$ ), BMI ( $P<0.001$ ), HbA1c  
29  
30 225 ( $P=0.002$ ), TG ( $P<0.001$ ), HDL-C ( $P<0.001$ ), hs-CRP ( $P=0.009$ ), uric acid ( $P=0.001$ ),  
31  
32 226 and TG/HDL-C ratio ( $P <0.001$ ) showed significant differences among the three  
33  
34 227 groups. There was no significant difference among the grades of sarcopenia about  
35  
36  
37 228 SBP ( $P=0.621$ ), DBP ( $P=0.337$ ), plasma glucose ( $P=0.205$ ), TC ( $P=0.389$ ), LDL-C  
38  
39 229 ( $P=0.629$ ), and eGFR ( $P=0.090$ ). Among the three groups, the proportions of median  
40  
41  
42 230 age ( $P=0.021$ ), residence ( $P<0.001$ ), education level ( $P=0.032$ ), overweight ( $P<0.001$ ),  
43  
44 231 awareness ( $P<0.001$ ) and treatment ( $P=0.008$ ) of diabetes, and TG/HDL-C ratio  
45  
46 232 ( $P<0.001$ ) showed significant differences. There was no significant difference with  
47  
48  
49 233 respect to the distributions of history of smoking ( $P=1.000$ ) and drinking ( $P=0.068$ )  
50  
51  
52 234 among them.

53  
54  
55  
56  
57  
58 235 The detailed data were shown in Table 1 and Table 2.  
59  
60

### 236 **3.2 Association between TG/HDL-C ratio and sarcopenia**

237 Compared with male participants with quartile 1 of TG/HDL-C ratio ( $\leq 1.41$ ), those  
238 with quartile 2 (1.42-2.35; OR 0.49, 95% CI 0.26 to 0.92,  $P=0.027$ ), 3 (2.36-4.71; OR  
239 0.36, 95% CI 0.19 to 0.69,  $P=0.002$ ), and 4 ( $>4.71$ ; OR 0.18, 95% CI 0.09 to 0.35,  
240  $P<0.001$ ) of TG/HDL-C ratio had reduced odds ratio of more severe sarcopenia in the  
241 unadjusted ordinal logistic regression (Model 1), respectively. In the  
242 multi-variable-adjusted model (Model 4), compared with male participants with  
243 quartile 1 of TG/HDL-C ratio ( $\leq 1.41$ ), those with quartile 2 (1.42-2.35; OR 0.48, 95%  
244 CI 0.24 to 0.97,  $P=0.042$ ) and 4 ( $>4.71$ ; OR 0.24, 95% CI 0.10 to 0.54,  $P=0.001$ ) of  
245 TG/HDL-C ratio were associated with lower risk of more severe sarcopenia,  
246 respectively.

247 Similarly, compared with female participants with quartile 1 of TG/HDL-C ratio  
248 ( $\leq 2.07$ ), those with quartile 2 (2.08-3.26; OR 0.24, 95% CI 0.12 to 0.46,  $P<0.001$ ), 3  
249 (3.27-5.61; OR 0.36, 95% CI 0.13 to 0.50,  $P<0.001$ ), and 4 ( $>5.61$ ; OR 0.17, 95% CI  
250 0.08 to 0.33,  $P<0.001$ ) of TG/HDL-C ratio were associated with depressed risk of  
251 more severe sarcopenia, in the unadjusted ordinal logistic regression (Model 1),  
252 respectively. The multi-variable-adjusted model (Model 4) showed that female  
253 participants with quartile 2 (2.08-3.26; OR 0.38, 95% CI 0.17 to 0.83,  $P=0.015$ ), 3  
254 (3.27-5.61; OR 0.26, 95% CI 0.12 to 0.57,  $P=0.001$ ), and 4 ( $>5.61$ ; OR 0.17, 95% CI  
255 0.07 to 0.44,  $P<0.001$ ) of TG/HDL-C ratio had reduced risk of more severe



1  
2  
3  
4 256 sarcopenia, respectively, compared with those with quartile 1 of TG/HDL-C ratio  
5  
6  
7 257 ( $\leq 2.07$ ).

8  
9  
10 258 Other adjusted models, Model 2 and Model 3, were shown in Table 3 and Table 4.

### 14 259 **3.3 Associations between TG/HDL-C ratio and components of sarcopenia**

17 260 Among male participants, simple and multivariate linear regression analysis showed  
18  
19  
20 261 that TG/HDL-C ratio categorized by quartile had no statistical correlation with  
21  
22  
23 262 handgrip strength and gait speed. In terms of the 5-time chair stand test, compared  
24  
25 263 with quartile 1 of TG/HDL-C ratio ( $\leq 1.41$ ), quartile 4 of TG/HDL-C ratio ( $> 4.71$ ) was  
26  
27  
28 264 associated with long chair-rising time in simple ( $\beta = 1.54$ , 95% CI 0.30 to 2.78,  
29  
30 265  $P = 0.015$ ) and multivariate ( $\beta = 2.60$ , 95% CI 1.19 to 4.00,  $P < 0.001$ ) linear regression.  
31  
32  
33 266 Yet simple and multivariate linear regression analysis showed that TG/HDL-C ratio  
34  
35  
36 267 categorized by quartile had a statistical correlation with muscle mass. In multivariate  
37  
38  
39 268 linear regression analysis, compared with quartile 1 of TG/HDL-C ratio ( $\leq 1.41$ ),  
40  
41 269 quartile 2 (1.42-2.35;  $\beta = 0.18$ , 95% CI 0.04 to 0.32,  $P = 0.009$ ), 3 (2.36-4.71;  $\beta = 0.18$ ,  
42  
43 270 95% CI 0.03 to 0.32,  $P = 0.016$ ), and 4 ( $> 4.71$ ;  $\beta = 0.36$ , 95% CI 0.20 to 0.51,  $P < 0.001$ )  
44  
45  
46 271 of TG/HDL-C ratio had associations with high height-adjusted muscle mass  
47  
48  
49 272 ( $ASM/height^2$ ), respectively.

50  
51  
52 273 Unlike male participants, compared with female participants with quartile 1 of  
53  
54 274 TG/HDL-C ratio ( $\leq 2.07$ ), those with quartile 4 of TG/HDL-C ratio ( $> 5.61$ ) were  
55  
56  
57 275 associated with high handgrip strength in simple ( $\beta = 3.16$ , 95% CI 0.78 to 5.54,  
58  
59  
60 276  $P = 0.009$ ) and multivariate ( $\beta = 3.93$ , 95% CI 0.89 to 6.97,  $P = 0.011$ ) linear regression.

1  
2  
3  
4 277 Yet there was no statistical correlation between TG/HDL-C ratio and gait speed, and  
5  
6  
7 278 the 5-time chair stand test. Similar to male participants, TG/HDL-C ratio categorized  
8  
9  
10 279 by quartile was correlated with muscle mass in linear regression analysis among  
11  
12 280 female participants. In multivariate linear regression analysis, compared with quartile  
13  
14 281 1 of TG/HDL-C ratio ( $\leq 2.07$ ), quartile 2 (2.08-3.26;  $\beta=0.30$ , 95% CI 0.12 to 0.47,  
15  
16  
17 282  $P=0.001$ ), 3 (3.27-5.61;  $\beta=0.28$ , 95% CI 0.11 to 0.45,  $P=0.001$ ), and 4 ( $>5.61$ ;  $\beta=0.31$ ,  
18  
19  
20 283 95% CI 0.10 to 0.51,  $P=0.003$ ) of TG/HDL-C ratio had associations with high  
21  
22 284 height-adjusted muscle mass (ASM/height<sup>2</sup>), respectively.

23  
24  
25  
26 285 Other detailed data were shown in Table 5.

#### 27 28 29 286 **4. Discussion**

30  
31  
32  
33 287 In this cohort, we found a negative association between TG/HDL-C ratio categorized  
34  
35 288 by quartile and sarcopenia, which means that higher TG/HDL-C ratio may be  
36  
37  
38 289 associated with better muscle status. Unlike previous studies [20,21], this study  
39  
40  
41 290 focused on elderly patients with diabetes from China, a supplement to existing  
42  
43 291 studies' populations and conclusions. In addition, our group further analyzed the  
44  
45  
46 292 correlation between TG/HDL-C ratio and specific components of sarcopenia,  
47  
48  
49 293 including muscle strength, physical performance, and muscle mass. Then, we found  
50  
51  
52 294 the results as followed for the first time: first, compared with the lowest quartile of  
53  
54 295 TG/HDL-C ratio ( $\leq 1.41$ ), the highest quartile of TG/HDL-C ratio ( $>4.71$ ) was  
55  
56  
57 296 associated with long chair-rising time among male elderly diabetics; second,  
58  
59 297 compared with the lowest quartile of TG/HDL-C ratio ( $\leq 2.07$ ), the highest quartile of  
60

1  
2  
3  
4 298 TG/HDL-C ratio ( $>5.61$ ) was associated with high handgrip strength among female  
5  
6  
7 299 elderly diabetics; third, high TG/HDL-C ratio categorized by quartile was correlated  
8  
9  
10 300 with increased muscle mass in both sexes. The above findings further explained that as  
11  
12 301 a widely and rapidly accessible lipid parameter, TG/HDL-C ratio had concrete  
13  
14  
15 302 interactions with sarcopenia.

16  
17  
18 303 Consistent with the previous finding in community-dwelling Chinese populations [21],  
19  
20  
21 304 this study showed that higher TG/HDL-C ratio was associated with a lower risk of  
22  
23  
24 305 more severe sarcopenia in older men and women with diabetes. This finding was  
25  
26  
27 306 contrary to the Korean male study [20]. As previous researchers mentioned, study  
28  
29  
30 307 design, gene diversity, and lifestyle factors in different populations led to variations in  
31  
32 308 lipid profiles [21]. Therefore, TG/HDL-C ratio, as an easily accessible lipid indicator,  
33  
34 309 would be considered a risk factor for sarcopenia in elderly Chinese patients with  
35  
36 310 diabetes.

37  
38  
39  
40 311 It is noted that there was gender differences in the association between TG/HDL-C  
41  
42  
43 312 ratio and partial muscle functions of elderly diabetics in our study. Only among male  
44  
45  
46 313 elderly diabetics, we found that patients with the highest quartile of TG/HDL-C ratio  
47  
48 314 ( $>4.71$ ) had longer chair-rising time than those with the lowest ( $\leq 1.41$ ). The other  
49  
50  
51 315 study using the CHARLS database also found similar results in the measurement of  
52  
53  
54 316 physical performance in participants with prediabetes ( $\geq 45$  years) [27]. This finding  
55  
56  
57 317 contradicted the main result, but the reason was unclear [27]. Then, we found that  
58  
59 318 patients with the highest quartile of TG/HDL-C ratio ( $>5.61$ ) showed higher muscle  
60

1  
2  
3  
4 319 strength than those with the lowest ( $\leq 2.07$ ), only among female elderly diabetics.  
5

6  
7 320 Previous studies have investigated the correlations between various metabolic indexes  
8  
9 321 and sarcopenia in different cohorts and found that their effects had sex differences  
10  
11 322 [28]. More detailed researches may help us understand this phenomenon in the future.  
12  
13

14  
15 323 Conversely, the associations between TG/HDL-C ratio and muscle mass of elderly  
16  
17 324 diabetics in different genders were consistent in this study. Regardless of gender, we  
18  
19 325 found that high quartile of TG/HDL-C ratio was correlated with increased muscle  
20  
21 326 mass. At present, AWGS 2019 recommends using dual-energy X-ray absorptiometry  
22  
23 327 (DXA) or multifrequency bioelectrical impedance analysis (BIA) for measuring  
24  
25 328 muscle mass in sarcopenia diagnosis [1]. Our findings suggest that TG/HDL-C ratio  
26  
27 329 can be used as a relatively simple screening indicator for muscle mass and help  
28  
29 330 clinicians identify elderly diabetics at high risk of muscle mass deficiency.  
30  
31  
32  
33  
34  
35  
36

37 331 In general, in addition to proposing an easily accessible parameter for screening  
38  
39 332 sarcopenia in elderly diabetic patients, we try to provide ideas for the prevention and  
40  
41 333 treatment of sarcopenia in people with diabetes. Recently, sarcopenia has been  
42  
43 334 implicated as both a cause and consequence of diabetes [10,11]. However, there was  
44  
45 335 insufficient evidence for treatment recommendations for diabetic patients with  
46  
47 336 sarcopenia, including nutritional supplements, dietary advice, and planned exercise  
48  
49 337 [10]. Therefore, future intervention studies (suitable TG supplementation and HDL-C  
50  
51 338 control) for diabetic patients with sarcopenia can further investigate the interactions  
52  
53  
54  
55  
56  
57  
58  
59  
60

1  
2  
3  
4 339 between lipid profile and sarcopenia and provide others evidence for the prevention  
5  
6  
7 340 and treatment of sarcopenia.  
8  
9

10 341 There are several limitations of our study. First, causality and mechanism could not be  
11  
12 342 determined due to this cross-sectional study. Second, this study only involved elderly  
13  
14  
15 343 patients with diabetes from the CHARLS, which may also have resulted in selection  
16  
17  
18 344 bias. Third, the type of diabetes was uncertain because the diagnosis of diabetes was  
19  
20  
21 345 based on self-report, and measurement of blood glucose and HbA1c. Fourth, multiple  
22  
23 346 comorbidities and history of drug using were not included in the analysis, and future  
24  
25  
26 347 studies need to take more considerations for them in clinical practice. Fifth, instead of  
27  
28  
29 348 the AWGS 2019 recommendation, we used a previously validated anthropometric  
30  
31 349 equation to assess the muscle mass, which may also have led to measurement bias.  
32  
33

## 34 350 **5. Conclusions**

35  
36  
37  
38 351 In conclusion, there was a negative association between TG/HDL-C ratio categorized  
39  
40  
41 352 by quartile and sarcopenia, which means that higher TG/HDL-C ratio may be related  
42  
43  
44 353 to better muscle status. Future prospective and intervention studies were needed to be  
45  
46  
47 354 investigated the relationship between lipid profiles and the occurrence, prevention,  
48  
49 355 and treatment of sarcopenia.  
50

## 51 356 **6. Declarations**

## 52 53 54 55 56 357 **Funding** 57 58 59 60

1  
2  
3  
4 358 This research received no specific grant from any funding agency in the public,  
5  
6  
7 359 commercial or not-for-profit sectors.  
8  
9

### 10 360 **Competing interests**

11  
12  
13  
14 361 The authors declare that they have no competing interests.  
15  
16

### 17 362 **Authors' contributions**

18  
19  
20  
21 363 YL contributed to the study concept and design, data acquisition and analysis, and  
22  
23  
24 364 drafted the manuscript. SZ contributed to revising the manuscript. ZS contributed to  
25  
26  
27 365 providing technical and material support. ZS also contributed to the supervision of  
28  
29  
30 366 this study. All authors read and approved the final manuscript.  
31

### 32 367 **Ethics approval and consent to participate**

33  
34  
35  
36 368 The CHARLS protocol was conducted following the Declaration of Helsinki and  
37  
38  
39 369 approved by the Biomedical Ethical Review Committee of Peking University  
40  
41  
42 370 (IRB00001052-11015). All participants provided written informed consent.  
43  
44

### 45 371 **Availability of data and materials**

46  
47  
48  
49 372 The CHARLS datasets are available on request from their home page at  
50  
51  
52 373 <http://charls.pku.edu.cn/>.  
53

### 54 374 **Acknowledgments**

55  
56  
57  
58  
59  
60

1  
2  
3  
4 375 The authors would like to thank the National Development Institute of Peking  
5  
6  
7 376 University and the Chinese Center for Social Sciences Survey of Peking University  
8  
9  
10 377 for providing the CHARLS data.

11  
12  
13 378 **References**

14  
15  
16 379 1.Chen LK, Woo J, Assantachai P, Auyeung TW, Chou MY, Iijima K, et al. Asian  
17  
18  
19 380 Working Group for Sarcopenia: 2019 Consensus Update on Sarcopenia Diagnosis and  
20  
21  
22 381 Treatment. *J Am Med Dir Assoc.* 2020;21(3):300–307.e2. doi:  
23  
24 382 10.1016/j.jamda.2019.12.012.

25  
26  
27  
28 383 2.Zhang X, Huang P, Dou Q, Wang C, Zhang W, Yang Y, et al. Falls among older  
29  
30  
31 384 adults with sarcopenia dwelling in nursing home or community: A meta-analysis. *Clin*  
32  
33 385 *Nutr.* 2020;39(1):33-39. doi: 10.1016/j.clnu.2019.01.002.

34  
35  
36  
37 386 3.Cruz-Jentoft AJ, Sayer AA. Sarcopenia. *Lancet.* 2019;393(10191):2636-2646. doi:  
38  
39 387 10.1016/S0140-6736(19)31138-9.

40  
41  
42  
43 388 4.Cruz-Jentoft AJ, Bahat G, Bauer J, Boirie Y, Bruyère O, Cederholm T, et al.  
44  
45  
46 389 Sarcopenia: revised European consensus on definition and diagnosis. *Age Ageing.*  
47  
48 390 2019;48(1):16-31. doi: 10.1093/ageing/afy169.

49  
50  
51 391 5.Cawthon PM, Lui LY, Taylor BC, McCulloch CE, Cauley JA, Lapidus J, et al.  
52  
53  
54 392 Clinical Definitions of Sarcopenia and Risk of Hospitalization in  
55  
56  
57 393 Community-Dwelling Older Men: The Osteoporotic Fractures in Men Study. *J*  
58  
59 394 *Gerontol A Biol Sci Med Sci.* 2017;72(10):1383-1389. doi: 10.1093/gerona/glw327.

- 1  
2  
3  
4 395 6.Woo J, Leung J, Morley JE. Defining sarcopenia in terms of incident adverse  
5  
6  
7 396 outcomes. *J Am Med Dir Assoc.* 2015;16(3):247-252. doi:  
8  
9 397 10.1016/j.jamda.2014.11.013.  
10  
11  
12  
13 398 7.Kitamura A, Seino S, Abe T, Nofuji Y, Yokoyama Y, Amano H, et al. Sarcopenia:  
14  
15 399 prevalence, associated factors, and the risk of mortality and disability in Japanese  
16  
17  
18 400 older adults. *J Cachexia Sarcopenia Muscle.* 2021;12(1):30-38. doi:  
19  
20 401 10.1002/jcsm.12651.  
21  
22  
23  
24 402 8.Cruz-Jentoft AJ, Landi F, Schneider SM, Zúñiga C, Arai H, Boirie Y, et al.  
25  
26  
27 403 Prevalence of and interventions for sarcopenia in ageing adults: a systematic review.  
28  
29 404 Report of the International Sarcopenia Initiative (EWGSOP and IWGS). *Age Ageing.*  
30  
31 405 2014;43(6):748-759. doi: 10.1093/ageing/afu115.  
32  
33  
34  
35 406 9.Sayer AA. Sarcopenia. *BMJ.* 2010;10:341.c4097. doi: 10.1136/bmj.c4097.  
36  
37  
38  
39 407 10.Mesinovic J, Zengin A, De Courten B, Ebeling PR, Scott D. Sarcopenia and type 2  
40  
41 408 diabetes mellitus: a bidirectional relationship. *Diabetes Metab Syndr Obes.* 2019;  
42  
43 409 12:1057-1072. doi: 10.2147/DMSO.S186600.  
44  
45  
46  
47  
48 410 11.Wen CY, Lien AS, Jiang YD. Sarcopenia in elderly diabetes. *J Diabetes Investig.*  
49  
50 411 2022;13(6):944-946. doi: 10.1111/jdi.13752.  
51  
52  
53  
54 412 12.Wong E, Backholer K, Gearon E, Harding J, Freak-Poli R, Stevenson C, et al.  
55  
56  
57 413 Diabetes and risk of physical disability in adults: a systematic review and  
58  
59  
60



- 1  
2  
3  
4 414 meta-analysis. *Lancet Diabetes Endocrinol.* 2013;1(2):106-114. doi:  
5  
6  
7 415 10.1016/S2213-8587(13)70046-9.  
8  
9  
10 416 13.Izzo A, Massimino E, Riccardi G, Della Pepa G. A Narrative Review on  
11  
12  
13 417 Sarcopenia in Type 2 Diabetes Mellitus: Prevalence and Associated Factors. *Nutrients.*  
14  
15 418 2021;13(1):183. doi: 10.3390/nu13010183.  
16  
17  
18  
19 419 14.He Q, Wang X, Yang C, Zhuang X, Yue Y, Jing H, et al. Metabolic and  
20  
21  
22 420 Nutritional Characteristics in Middle-Aged and Elderly Sarcopenia Patients with Type  
23  
24 421 2 Diabetes. *J Diabetes Res.* 2020;2020:6973469. doi: 10.1155/2020/6973469.  
25  
26  
27  
28 422 15.Sugimoto K, Tabara Y, Ikegami H, Takata Y, Kamide K, Ikezoe T, et al.  
29  
30 423 Hyperglycemia in non-obese patients with type 2 diabetes is associated with low  
31  
32  
33 424 muscle mass: The Multicenter Study for Clarifying Evidence for Sarcopenia in  
34  
35 425 Patients with Diabetes Mellitus. *J Diabetes Investig.* 2019;10:1471–1479. doi:  
36  
37 426 10.1111/jdi.13070.  
38  
39  
40  
41  
42 427 16.Eeg-Olofsson K, Gudbjörnsdottir S, Eliasson B, Zethelius B, Cederholm J. The  
43  
44 428 triglycerides-to-HDL-cholesterol ratio and cardiovascular disease risk in obese  
45  
46  
47 429 patients with type 2 diabetes: an observational study from the Swedish National  
48  
49 430 Diabetes Register (NDR). *Diabetes Res Clin Pract.* 2014;106(1):136-144. doi:  
50  
51 431 10.1016/j.diabres.2014.07.010.  
52  
53  
54  
55  
56 432 17.Yang SH, Du Y, Li XL, Zhang Y, Li S, Xu RX, et al. Triglyceride to High-Density  
57  
58 433 Lipoprotein Cholesterol Ratio and Cardiovascular Events in Diabetics With Coronary  
59  
60

- 1  
2  
3  
4 434 Artery Disease. Am J Med Sci. 2017;354(2):117-124. doi:  
5  
6  
7 435 10.1016/j.amjms.2017.03.032.  
8  
9  
10 436 18.Cordero A, Andrés E, Ordoñez B, León M, Laclaustra M, Grima A, et al.  
11  
12  
13 437 Usefulness of triglycerides-to-high-density lipoprotein cholesterol ratio for predicting  
14  
15 438 the first coronary event in men. Am J Cardiol. 2009;104(10):393-397. doi:  
16  
17  
18 439 10.1016/j.amjcard.2009.07.008.  
19  
20  
21 440 19.Bittner V, Johnson BD, Zineh I, Rogers WJ, Vido D, Marroquin OC, et al. The  
22  
23  
24 441 triglyceride/high-density lipoprotein cholesterol ratio predicts all-cause mortality in  
25  
26  
27 442 women with suspected myocardial ischemia: a report from the Women's Ischemia  
28  
29  
30 443 Syndrome Evaluation (WISE). Am Heart J. 2009;157(3):548-555. doi:  
31  
32  
33 444 10.1016/j.ahj.2008.11.014.  
34  
35  
36 445 20.Chung TH, Kwon YJ, Shim JY, Lee YJ. Association between serum triglyceride to  
37  
38  
39 446 high-density lipoprotein cholesterol ratio and sarcopenia in elderly Korean males: The  
40  
41  
42 447 Korean National Health and Nutrition Examination Survey. Clin Chim Acta. 2016;  
43  
44 448 463:165-168. doi: 10.1016/j.cca.2016.10.032.  
45  
46  
47 449 21.Wang N, Chen M, Fang D. Relationship between serum triglyceride to  
48  
49  
50 450 high-density lipoprotein cholesterol ratio and sarcopenia occurrence rate in  
51  
52  
53 451 community-dwelling Chinese adults. Lipids Health Dis. 2020;19(1):248. doi:  
54  
55 452 10.1186/s12944-020-01422-4.  
56  
57  
58  
59  
60

- 1  
2  
3  
4 453 22.Zhao Y, Hu Y, Smith JP, Strauss J, Yang G. Cohort profile: the China Health and  
5  
6  
7 454 Retirement Longitudinal Study (CHARLS). *Int J Epidemiol.* 2014;43(1):61-68.  
8  
9 455 doi:10.1093/ije/dys203.  
10  
11  
12  
13 456 23.American Diabetes Association. Classification and Diagnosis of Diabetes:  
14  
15 457 Standards of Medical Care in Diabetes-2020. *Diabetes Care.* 2020;43(Suppl  
16  
17  
18 458 1):S14-S31. doi: 10.2337/dc20-S002.  
19  
20  
21  
22 459 24.Levey AS, Stevens LA, Schmid CH, Zhang YL, Castro AF 3rd, Feldman HI, et al.  
23  
24 460 A new equation to estimate glomerular filtration rate. *Ann Intern Med.* 2009;  
25  
26  
27 461 150(9):604-612. doi: 10.7326/0003-4819-150-9-200905050-00006.  
28  
29  
30  
31 462 25.Wen X, Wang M, Jiang CM, Zhang YM. Anthropometric equation for estimation  
32  
33 463 of appendicular skeletal muscle mass in Chinese adults. *Asia Pac J Clin Nutr.* 2011;  
34  
35  
36 464 20(4):551-556.  
37  
38  
39  
40 465 26.Wu X, Li X, Xu M, Zhang Z, He L, Li Y. Sarcopenia prevalence and associated  
41  
42 466 factors among older Chinese population: Findings from the China Health and  
43  
44 467 Retirement Longitudinal Study. *PLoS One.* 2021;16(3):e0247617. doi:  
45  
46  
47 468 10.1371/journal.pone.0247617.  
48  
49  
50  
51 469 27.Qiu S, Cai X, Yuan Y, Xie B, Sun Z, Wang D, et al. Muscle strength and  
52  
53 470 prediabetes progression and regression in middle-aged and older adults: a prospective  
54  
55  
56 471 cohort study. *J Cachexia Sarcopenia Muscle.* 2022;13(2):909-918. doi:  
57  
58  
59 472 10.1002/jcsm.12905.  
60

- 1  
2  
3  
4 473 28.Du Y, Oh C, No J. Associations between Sarcopenia and Metabolic Risk Factors:  
5  
6  
7 474 A Systematic Review and Meta-Analysis. J Obes Metab Syndr. 2018;27(3):175-185.  
8  
9 475 doi: 10.7570/jomes.2018.27.3.1  
10  
11  
12  
13  
14  
15  
16  
17  
18  
19  
20  
21  
22  
23  
24  
25  
26  
27  
28  
29  
30  
31  
32  
33  
34  
35  
36  
37  
38  
39  
40  
41  
42  
43  
44  
45  
46  
47  
48  
49  
50  
51  
52  
53  
54  
55  
56  
57  
58  
59  
60

For peer review only

Table 1. Baseline characteristics of male elderly patients with diabetes according to sarcopenia status.

| Variables                                | Total (n=368)     | No sarcopenia (n=29) | Possible sarcopenia (n=268) | Sarcopenia (n=71) | <i>P</i> -value |
|------------------------------------------|-------------------|----------------------|-----------------------------|-------------------|-----------------|
| Age (years)                              | 66.0 (62.0, 72.0) | 64.0 (62.0, 68.0)    | 65.0 (62.0, 70.0)           | 71.0 (65.0, 77.0) | <0.001          |
| ≤Median                                  |                   | 19 (65.5)            | 155 (57.8)                  | 24 (33.8)         | 0.001           |
| >Median                                  |                   | 10 (34.5)            | 113 (42.2)                  | 47 (66.2)         |                 |
| Handgrip strength (kg)                   | 34.5 (28.5, 40.5) | 41.5 (36.5, 45.0)    | 35.0 (29.8, 41.0)           | 29.0 (21.0, 33.5) | <0.001          |
| Gait speed (m/s) <sup>a</sup>            | 0.66 (0.52, 0.79) | 1.10 (1.04, 1.18)    | 0.64 (0.52, 0.78)           | 0.62 (0.49, 0.71) | <0.001          |
| 5-time chair stand test (s) <sup>a</sup> | 10.5 (8.8, 13.2)  | 9.5 (6.9, 19.5)      | 10.3 (8.6, 13.0)            | 11.9 (9.6, 14.0)  | <0.001          |
| ASM/Ht <sup>2</sup> (kg/m <sup>2</sup> ) | 7.61 (7.10, 8.16) | 7.71 (7.47, 8.41)    | 7.84 (7.40, 8.24)           | 6.71 (6.44, 6.87) | <0.001          |
| Residence (%)                            |                   |                      |                             |                   | 0.001           |
| Urban                                    | 150 (40.8)        | 13 (44.8)            | 122 (45.5)                  | 15 (21.1)         |                 |
| Rural                                    | 218 (59.2)        | 16 (55.2)            | 146 (54.5)                  | 56 (78.9)         |                 |

|                                        |                      |                      |                      |                      |        |
|----------------------------------------|----------------------|----------------------|----------------------|----------------------|--------|
| Education (%)                          |                      |                      |                      |                      |        |
| Less than lower secondary              | 338 (91.8)           | 25 (86.3)            | 244 (91.0)           | 69 (97.2)            |        |
| Upper secondary or vocational training | 15 (4.1)             | 1 (3.4)              | 12 (4.5)             | 2 (2.8)              | 0.119  |
| Tertiary                               | 15 (4.1)             | 3 (10.3)             | 12 (4.5)             | 0 (0)                |        |
| Ever/current smoke (%) <sup>a</sup>    | 270 (73.8)           | 20 (69.0)            | 194 (72.7)           | 56 (80.0)            | 0.384  |
| Ever/current drinking (%) <sup>a</sup> | 236 (64.7)           | 18 (62.1)            | 165 (62.0)           | 53 (75.7)            | 0.099  |
| BMI (kg/m <sup>2</sup> )               | 23.7 (21.1, 26.2)    | 24.2 (22.3, 27.8)    | 24.6 (22.5, 26.8)    | 19.1 (17.8, 19.9)    | <0.001 |
| Overweight (%)                         | 131 (35.6)           | 12 (41.4)            | 119 (44.4)           | 0 (0)                | <0.001 |
| Blood pressure (mm Hg) <sup>a</sup>    |                      |                      |                      |                      |        |
| Systolic                               | 135.5 (124.5, 147.0) | 130.0 (124.0, 136.0) | 138.0 (125.0, 149.5) | 132.5 (121.0, 145.0) | 0.011  |
| Diastolic                              | 75.5 (68.5, 82.5)    | 74.0 (68.5, 81.0)    | 76.5 (70.0, 83.5)    | 73.5 (63.5, 79.0)    | 0.007  |
| Diabetes management (%)                |                      |                      |                      |                      |        |

|    |                                     |                      |                      |                      |                      |        |
|----|-------------------------------------|----------------------|----------------------|----------------------|----------------------|--------|
| 1  |                                     |                      |                      |                      |                      |        |
| 2  |                                     |                      |                      |                      |                      |        |
| 3  |                                     |                      |                      |                      |                      |        |
| 4  |                                     |                      |                      |                      |                      |        |
| 5  | Awareness                           | 139 (37.8)           | 14 (48.3)            | 107 (39.9)           | 18 (25.4)            |        |
| 6  |                                     |                      |                      |                      |                      | 0.038  |
| 7  |                                     |                      |                      |                      |                      |        |
| 8  | Unawareness                         | 229 (62.2)           | 15 (51.7)            | 161 (60.1)           | 53 (74.6)            |        |
| 9  |                                     |                      |                      |                      |                      |        |
| 10 |                                     |                      |                      |                      |                      |        |
| 11 | Treatment                           | 94 (25.5)            | 11 (37.9)            | 71 (26.5)            | 12 (16.9)            |        |
| 12 |                                     |                      |                      |                      |                      | 0.072  |
| 13 |                                     |                      |                      |                      |                      |        |
| 14 | Untreatment                         | 274 (74.5)           | 18 (62.1)            | 197 (73.5)           | 59 (83.1)            |        |
| 15 |                                     |                      |                      |                      |                      |        |
| 16 | Plasma glucose (mg/dL) <sup>b</sup> | 138.7 (126.4, 175.2) | 139.9 (126.4, 197.5) | 139.1 (126.4, 175.2) | 137.3 (126.4, 175.0) | 0.763  |
| 17 |                                     |                      |                      |                      |                      |        |
| 18 |                                     |                      |                      |                      |                      |        |
| 19 | HbA1c (%)                           | 5.6 (5.1, 6.9)       | 6.2 (5.3, 7.7)       | 5.6 (5.2, 7.1)       | 5.3 (5.0, 5.9)       | 0.007  |
| 20 |                                     |                      |                      |                      |                      |        |
| 21 |                                     |                      |                      |                      |                      |        |
| 22 | TC (mg/dL)                          | 186.5 (160.8, 213.2) | 174.4 (156.6, 190.3) | 190.8 (165.5, 216.1) | 171.7 (149.2, 202.6) | 0.006  |
| 23 |                                     |                      |                      |                      |                      |        |
| 24 |                                     |                      |                      |                      |                      |        |
| 25 | TG (mg/dL)                          | 111.1 (78.8, 172.1)  | 121.2 (82.3, 187.6)  | 115.1 (82.3, 185.0)  | 88.5 (67.3, 130.1)   | 0.001  |
| 26 |                                     |                      |                      |                      |                      |        |
| 27 |                                     |                      |                      |                      |                      |        |
| 28 | LDL-C (mg/dL) <sup>a</sup>          | 109.1±35.4           | 108.3±30.6           | 111.9±36.2           | 98.9±32.5            | 0.002  |
| 29 |                                     |                      |                      |                      |                      |        |
| 30 |                                     |                      |                      |                      |                      |        |
| 31 | HDL-C (mg/dL)                       | 45.6 (37.1, 57.2)    | 40.6 (33.2, 48.3)    | 44.7 (34.6, 55.1)    | 53.0 (44.1, 66.9)    | <0.001 |
| 32 |                                     |                      |                      |                      |                      |        |
| 33 | hs-CRP (mg/L)                       | 1.33 (0.72, 3.13)    | 1.80 (0.77, 4.00)    | 1.38 (0.73, 3.01)    | 1.10 (0.68, 3.68)    | 0.470  |
| 34 |                                     |                      |                      |                      |                      |        |
| 35 |                                     |                      |                      |                      |                      |        |
| 36 | Uric acid (mg/dL)                   | 4.88 (4.08, 5.85)    | 4.27 (3.73, 5.20)    | 4.99 (4.19, 6.00)    | 4.70 (3.91, 5.40)    | 0.024  |
| 37 |                                     |                      |                      |                      |                      |        |
| 38 |                                     |                      |                      |                      |                      |        |
| 39 |                                     |                      |                      |                      |                      |        |
| 40 |                                     |                      |                      |                      |                      |        |
| 41 |                                     |                      |                      |                      |                      | 28     |
| 42 |                                     |                      |                      |                      |                      |        |
| 43 |                                     |                      |                      |                      |                      |        |
| 44 |                                     |                      |                      |                      |                      |        |
| 45 |                                     |                      |                      |                      |                      |        |
| 46 |                                     |                      |                      |                      |                      |        |

|                                    |                   |                   |                   |                   |        |
|------------------------------------|-------------------|-------------------|-------------------|-------------------|--------|
| eGFR (mL/min/1.73 m <sup>2</sup> ) | 88.9 (74.0, 96.3) | 94.2 (73.9, 99.2) | 88.1 (74.3, 95.9) | 88.9 (72.8, 95.7) | 0.349  |
| TG/HDL-C                           | 2.35 (1.41, 4.71) | 3.73 (1.91, 6.51) | 2.55 (1.59, 4.97) | 1.49 (1.10, 2.48) | <0.001 |
| Quartile 1 (≤1.41)                 |                   | 4 (13.8)          | 56 (20.9)         | 32 (45.1)         |        |
| Quartile 2 (1.42-2.35)             |                   | 6 (20.7)          | 67 (25.0)         | 19 (26.8)         |        |
| Quartile 3 (2.36-4.71)             |                   | 8 (27.6)          | 69 (25.7)         | 15 (21.1)         | <0.001 |
| Quartile 4 (>4.71)                 |                   | 11 (37.9)         | 76 (28.4)         | 5 (7.0)           |        |

476 Data are shown as means ± standard deviation, median (interquartile range), or numbers (percentages).

477 a. Missing data: 15 for gait speed, 11 for 5-time chair stand test, 2 for history of smoking, 3 for history of drinking, 5 for blood pressure and 1 for LDL-C.

478 b. Among the measurements of plasma glucose, 17 male participants were non-fasting.

479 Abbreviations: ASM/Ht<sup>2</sup>: the height-adjusted muscle mass; BMI: the body mass index; HbA1c: glycated hemoglobin; TC: total cholesterol; TG: triglyceride; LDL-C:  
 480 low-density lipoprotein cholesterol; HDL-C: high-density lipoprotein cholesterol ratio; hs-CRP: high-sensitivity C-reactive protein; eGFR: the estimated glomerular  
 481 filtration rate; TG/HDL-C: triglyceride to high-density lipoprotein cholesterol ratio.

482



Table 2. Baseline characteristics of female elderly patients with diabetes according to sarcopenia status.

| Variables                                | Total (n=384)     | No sarcopenia (n=20) | Possible sarcopenia (n=289) | Sarcopenia (n=75) | <i>P</i> -value |
|------------------------------------------|-------------------|----------------------|-----------------------------|-------------------|-----------------|
| Age (years)                              | 67.0 (63.0, 71.5) | 63.0 (61.0, 66.5)    | 66.0 (62.0, 71.0)           | 69.0 (65.0, 75.0) | <0.001          |
| ≤Median                                  |                   | 16 (80.0)            | 167 (57.8)                  | 35 (46.7)         | 0.021           |
| >Median                                  |                   | 4 (20.0)             | 122 (42.2)                  | 40 (53.3)         |                 |
| Handgrip strength (kg)                   | 22.8 (18.0, 27.5) | 27.8 (24.6, 32.3)    | 23.5 (18.5, 28.0)           | 19.8 (16.0, 23.0) | <0.001          |
| Gait speed (m/s) <sup>a</sup>            | 0.63 (0.47, 0.76) | 1.10 (1.03, 1.17)    | 0.63 (0.47, 0.75)           | 0.58 (0.46, 0.69) | <0.001          |
| 5-time chair stand test (s) <sup>a</sup> | 11.3 (9.1, 14.5)  | 7.9 (7.3, 8.7)       | 11.6 (9.4, 14.8)            | 11.4 (9.4, 14.7)  | <0.001          |
| ASM/Ht <sup>2</sup> (kg/m <sup>2</sup> ) | 5.89 (5.38, 6.55) | 6.28 (5.55, 6.57)    | 6.16 (5.71, 6.72)           | 4.90 (4.67, 5.06) | <0.001          |
| Residence (%)                            |                   |                      |                             |                   | <0.001          |
| Urban                                    | 170 (44.3)        | 15 (75.0)            | 135 (46.7)                  | 20 (26.7)         |                 |
| Rural                                    | 214 (55.7)        | 5 (25.0)             | 154 (53.3)                  | 55 (73.3)         |                 |

## Education (%)

|                                        |                      |                      |                      |                      |        |
|----------------------------------------|----------------------|----------------------|----------------------|----------------------|--------|
| Less than lower secondary              | 367 (95.6)           | 17 (85.0)            | 276 (95.5)           | 74 (98.7)            |        |
| Upper secondary or vocational training | 13 (3.4)             | 2 (10.0)             | 11 (3.8)             | 0 (0)                | 0.032  |
| Tertiary                               | 4 (1.0)              | 1 (5.0)              | 2 (0.7)              | 1 (1.3)              |        |
| Ever/current smoke (%) <sup>a</sup>    | 33 (8.6)             | 1 (5.0)              | 26 (9.0)             | 6 (8.1)              | 1.000  |
| Ever/current drinking (%) <sup>a</sup> | 59 (15.4)            | 0 (0)                | 50 (17.4)            | 9 (12.2)             | 0.068  |
| BMI (kg/m <sup>2</sup> )               | 24.7 (22.0, 27.6)    | 25.5 (22.2, 26.4)    | 25.6 (23.5, 28.0)    | 19.7 (18.6, 20.9)    | <0.001 |
| Overweight (%)                         | 176 (45.8)           | 11 (55.0)            | 164 (56.7)           | 1 (1.3)              | <0.001 |
| Blood pressure (mm Hg) <sup>a</sup>    |                      |                      |                      |                      |        |
| Systolic                               | 140.0 (123.5, 155.0) | 133.3 (126.0, 150.5) | 140.5 (124.0, 155.5) | 138.0 (119.0, 154.5) | 0.621  |
| Diastolic                              | 75.5 (67.0, 83.0)    | 73.0 (67.5, 82.5)    | 76.0 (67.5, 83.5)    | 74.5 (65.0, 80.5)    | 0.337  |

## Diabetes management (%)

|    |                                     |                      |                      |                      |                      |        |
|----|-------------------------------------|----------------------|----------------------|----------------------|----------------------|--------|
| 1  |                                     |                      |                      |                      |                      |        |
| 2  |                                     |                      |                      |                      |                      |        |
| 3  |                                     |                      |                      |                      |                      |        |
| 4  |                                     |                      |                      |                      |                      |        |
| 5  | Awareness                           | 166 (43.2)           | 8 (40.0)             | 142 (49.1)           | 16 (21.3)            |        |
| 6  |                                     |                      |                      |                      |                      |        |
| 7  |                                     |                      |                      |                      |                      | <0.001 |
| 8  | Unawareness                         | 218 (56.8)           | 12 (60.0)            | 147 (50.9)           | 59 (78.7)            |        |
| 9  |                                     |                      |                      |                      |                      |        |
| 10 |                                     |                      |                      |                      |                      |        |
| 11 | Treatment                           | 104 (27.1)           | 5 (25.0)             | 89 (30.8)            | 10 (13.3)            |        |
| 12 |                                     |                      |                      |                      |                      |        |
| 13 |                                     |                      |                      |                      |                      | 0.008  |
| 14 | Untreatment                         | 280 (72.9)           | 15 (75.0)            | 200 (69.2)           | 65 (86.7)            |        |
| 15 |                                     |                      |                      |                      |                      |        |
| 16 | Plasma glucose (mg/dL) <sup>b</sup> | 141.2 (126.5, 177.7) | 134.2 (106.0, 160.3) | 142.7 (127.1, 179.8) | 138.2 (127.6, 173.2) | 0.205  |
| 17 |                                     |                      |                      |                      |                      |        |
| 18 |                                     |                      |                      |                      |                      |        |
| 19 | HbA1c (%)                           | 6.0 (5.4, 6.9)       | 5.9 (5.3, 7.0)       | 6.1 (5.5, 7.1)       | 5.6 (5.2, 6.5)       | 0.002  |
| 20 |                                     |                      |                      |                      |                      |        |
| 21 |                                     |                      |                      |                      |                      |        |
| 22 | TC (mg/dL)                          | 205.5 (178.6, 230.5) | 233.8 (178.1, 259.1) | 204.9 (176.7, 229.3) | 208.4 (184.4, 236.2) | 0.389  |
| 23 |                                     |                      |                      |                      |                      |        |
| 24 |                                     |                      |                      |                      |                      |        |
| 25 | TG (mg/dL)                          | 146.5 (106.2, 222.1) | 164.6 (135.4, 250.9) | 152.2 (112.4, 229.2) | 108.0 (80.5, 162.8)  | <0.001 |
| 26 |                                     |                      |                      |                      |                      |        |
| 27 |                                     |                      |                      |                      |                      |        |
| 28 | LDL-C (mg/dL) <sup>a</sup>          | 122.0±40.5           | 129.6±44.0           | 120.9±41.4           | 124.3±36.3           | 0.629  |
| 29 |                                     |                      |                      |                      |                      |        |
| 30 |                                     |                      |                      |                      |                      |        |
| 31 | HDL-C (mg/dL)                       | 45.2 (37.5, 53.0)    | 43.9 (37.7, 52.6)    | 42.9 (37.1, 51.4)    | 52.2 (43.3, 62.6)    | <0.001 |
| 32 |                                     |                      |                      |                      |                      |        |
| 33 | hs-CRP (mg/L)                       | 1.60 (0.80, 3.53)    | 1.95 (1.02, 2.78)    | 1.73 (0.90, 3.80)    | 1.08 (0.59, 2.60)    | 0.009  |
| 34 |                                     |                      |                      |                      |                      |        |
| 35 |                                     |                      |                      |                      |                      |        |
| 36 | Uric acid (mg/dL)                   | 4.33 (3.58, 5.21)    | 5.22 (3.88, 6.01)    | 4.35 (3.67, 5.24)    | 3.78 (3.25, 4.74)    | 0.001  |
| 37 |                                     |                      |                      |                      |                      |        |
| 38 |                                     |                      |                      |                      |                      |        |
| 39 |                                     |                      |                      |                      |                      |        |
| 40 |                                     |                      |                      |                      |                      | 32     |
| 41 |                                     |                      |                      |                      |                      |        |
| 42 |                                     |                      |                      |                      |                      |        |
| 43 |                                     |                      |                      |                      |                      |        |
| 44 |                                     |                      |                      |                      |                      |        |
| 45 |                                     |                      |                      |                      |                      |        |
| 46 |                                     |                      |                      |                      |                      |        |

|                                    |                   |                   |                   |                   |        |
|------------------------------------|-------------------|-------------------|-------------------|-------------------|--------|
| eGFR (mL/min/1.73 m <sup>2</sup> ) | 62.7 (45.5, 95.0) | 93.4 (52.9, 97.4) | 57.1 (45.2, 93.9) | 84.7 (45.5, 95.5) | 0.090  |
| TG/HDL-C                           | 3.26 (2.07, 5.61) | 4.06 (2.63, 6.62) | 3.45 (2.35, 5.99) | 2.02 (1.20, 4.27) | <0.001 |
| Quartile 1 ( $\leq 2.07$ )         | 95 (24.7)         | 4 (20.0)          | 51 (17.6)         | 40 (53.3)         |        |
| Quartile 2 (2.08-3.26)             | 98 (25.5)         | 4 (20.0)          | 82 (28.4)         | 12 (16.0)         |        |
| Quartile 3 (3.27-5.61)             | 95 (24.7)         | 6 (30.0)          | 74 (25.6)         | 15 (20.0)         | <0.001 |
| Quartile 4 ( $> 5.61$ )            | 96 (25.0)         | 6 (30.0)          | 82 (28.4)         | 8 (10.7)          |        |

483 Data are shown as means  $\pm$  standard deviation, median (interquartile range), or numbers (percentages).

484 a. Missing data: 23 for gait speed, 32 for 5-time chair stand test, 1 for history of smoking, 2 for history of drinking, 9 for blood pressure and 4 for LDL-C.

485 b. Among the measurements of plasma glucose, 22 female participants were non-fasting.

486 Abbreviations: ASM/Ht<sup>2</sup>: the height-adjusted muscle mass; BMI: the body mass index; HbA1c: glycated hemoglobin; TC: total cholesterol; TG: triglyceride; LDL-C:  
 487 low-density lipoprotein cholesterol; HDL-C: high-density lipoprotein cholesterol ratio; hs-CRP: high-sensitivity C-reactive protein; eGFR: the estimated glomerular  
 488 filtration rate; TG/HDL-C: triglyceride to high-density lipoprotein cholesterol ratio.

489

Table 3. Association between TG/HDL-C and sarcopenia status in male elderly patients with diabetes in ordinal logistic regression analysis.

| Variables                  | No sarcopenia<br>(n=29) | Possible sarcopenia<br>(n=268) | Sarcopenia<br>(n=71) | OR (95% CI)          |                      |                      |                      |
|----------------------------|-------------------------|--------------------------------|----------------------|----------------------|----------------------|----------------------|----------------------|
|                            |                         |                                |                      | Model 1 <sup>a</sup> | Model 2 <sup>b</sup> | Model 3 <sup>c</sup> | Model 4 <sup>d</sup> |
| TG/HDL-C                   |                         |                                |                      |                      |                      |                      |                      |
| Quartile 1 ( $\leq 1.41$ ) | 4 (13.8)                | 56 (20.9)                      | 32 (45.1)            | Reference            | Reference            | Reference            | Reference            |
| Quartile 2 (1.42-2.35)     | 6 (20.7)                | 67 (25.0)                      | 19 (26.8)            | 0.49 (0.26, 0.92)*   | 0.47 (0.25, 0.88)*   | 0.50 (0.26, 0.96)*   | 0.48 (0.24, 0.97)*   |
| Quartile 3 (2.36-4.71)     | 8 (27.6)                | 69 (25.7)                      | 15 (21.1)            | 0.36 (0.19, 0.69)**  | 0.33 (0.17, 0.65)**  | 0.41 (0.20, 0.80)**  | 0.56 (0.27, 1.17)    |
| Quartile 4 ( $> 4.71$ )    | 11 (37.9)               | 76 (28.4)                      | 5 (7.0)              | 0.18 (0.09, 0.35)*** | 0.18 (0.09, 0.37)*** | 0.24 (0.12, 0.49)*** | 0.24 (0.10, 0.54)**  |

490 a. Unadjusted (n=368).

491 b. Adjusted for median age (n=368).

492 c. Adjusted for median age, residence, education level, and history of smoking and drinking (n=365).

493 d. Adjusted for median age, residence, education level, and history of smoking and drinking, overweight, diabetes management, SBP, DBP, plasma glucose, HbA1c,  
494 TC, LDL-C, hs-CRP, uric acid, and eGFR (n=359).

1  
2  
3  
4  
5 495 \*  $P < 0.05$ ; \*\*  $P < 0.01$ ; \*\*\*  $P < 0.001$ .  
6

7 496 Abbreviations: TG/HDL-C: triglyceride to high-density lipoprotein cholesterol ratio; OR: odds ratio; 95% CI: 95% confidence interval; SBP: systolic blood pressure;  
8 497 DBP: diastolic blood pressure; HbA1c: glycated hemoglobin; TC: total cholesterol; LDL-C: low-density lipoprotein cholesterol; hs-CRP: high-sensitivity C-reactive  
9 498 protein; eGFR: the estimated glomerular filtration rate.  
10  
11

12 499  
13  
14  
15  
16  
17  
18  
19  
20  
21  
22  
23  
24  
25  
26  
27  
28  
29  
30  
31  
32  
33  
34  
35  
36  
37  
38  
39  
40  
41  
42  
43  
44  
45  
46

For peer review only

1  
2  
3  
4  
5  
6  
7  
8  
9  
10  
11  
12  
13  
14  
15  
16  
17  
18  
19  
20  
21  
22  
23  
24  
25  
26  
27  
28  
29  
30  
31  
32  
33  
34  
35  
36  
37  
38  
39  
40  
41  
42  
43  
44  
45  
46

Table 4. Association between TG/HDL-C and sarcopenia status in female elderly patients with diabetes in ordinal logistic regression analysis.

| Variables                  | No sarcopenia<br>(n=20) | Possible sarcopenia<br>(n=289) | Sarcopenia<br>(n=75) | OR (95% CI)                      |                                  |                                  |                                  |
|----------------------------|-------------------------|--------------------------------|----------------------|----------------------------------|----------------------------------|----------------------------------|----------------------------------|
|                            |                         |                                |                      | Model 1 <sup>a</sup>             | Model 2 <sup>b</sup>             | Model 3 <sup>c</sup>             | Model 4 <sup>d</sup>             |
| TG/HDL-C                   |                         |                                |                      |                                  |                                  |                                  |                                  |
| Quartile 1 ( $\leq 2.07$ ) | 4 (20.0)                | 51 (17.6)                      | 40 (53.3)            | Reference                        | Reference                        | Reference                        | Reference                        |
| Quartile 2 (2.08-3.26)     | 4 (20.0)                | 82 (28.4)                      | 12 (16.0)            | 0.24 (0.12, 0.46) <sup>***</sup> | 0.23 (0.12, 0.45) <sup>***</sup> | 0.28 (0.14, 0.56) <sup>***</sup> | 0.38 (0.17, 0.83) <sup>*</sup>   |
| Quartile 3 (3.27-5.61)     | 6 (30.0)                | 74 (25.6)                      | 15 (20.0)            | 0.36 (0.13, 0.50) <sup>***</sup> | 0.25 (0.13, 0.49) <sup>***</sup> | 0.26 (0.13, 0.50) <sup>***</sup> | 0.26 (0.12, 0.57) <sup>**</sup>  |
| Quartile 4 ( $> 5.61$ )    | 6 (30.0)                | 82 (28.4)                      | 8 (10.7)             | 0.17 (0.08, 0.33) <sup>***</sup> | 0.17 (0.09, 0.34) <sup>***</sup> | 0.18 (0.09, 0.37) <sup>***</sup> | 0.17 (0.07, 0.44) <sup>***</sup> |

500 a. Unadjusted (n=384).  
501 b. Adjusted for median age (n=384).  
502 c. Adjusted for median age, residence, education level, and history of smoking and drinking (n=382).  
503 d. Adjusted for median age, residence, education level, and history of smoking and drinking, overweight, diabetes management, SBP, DBP, plasma glucose, HbA1c,  
504 TC, LDL-C, hs-CRP, uric acid, and eGFR (n=368).

1  
2  
3  
4  
5 505 \*  $P < 0.05$ ; \*\*  $P < 0.01$ ; \*\*\*  $P < 0.001$ .  
6

7 506 Abbreviations: TG/HDL-C: triglyceride to high-density lipoprotein cholesterol ratio; OR: odds ratio; 95% CI: 95% confidence interval; SBP: systolic blood pressure;  
8 507 DBP: diastolic blood pressure; HbA1c: glycated hemoglobin; TC: total cholesterol; LDL-C: low-density lipoprotein cholesterol; hs-CRP: high-sensitivity C-reactive  
9 508 protein; eGFR: the estimated glomerular filtration rate.  
10  
11

12 509  
13  
14  
15  
16  
17  
18  
19  
20  
21  
22  
23  
24  
25  
26  
27  
28  
29  
30  
31  
32  
33  
34  
35  
36  
37  
38  
39  
40  
41  
42  
43  
44  
45  
46

For peer review only



1  
2  
3  
4  
5  
6  
7  
8  
9  
10  
11  
12  
13  
14  
15  
16  
17  
18  
19  
20  
21  
22  
23  
24  
25  
26  
27  
28  
29  
30  
31  
32  
33  
34  
35  
36  
37  
38  
39  
40  
41  
42  
43  
44  
45  
46

Table 5. Associations between TG/HDL-C and muscle strength, physical performance, and muscle mass among elderly patients with diabetes in linear regression analysis.

| Variables              | Male                     |                                             | Female                 |                          |                                             |
|------------------------|--------------------------|---------------------------------------------|------------------------|--------------------------|---------------------------------------------|
|                        | β (95% CI)               |                                             | β (95% CI)             |                          |                                             |
|                        | Simple linear regression | Multivariate linear regression <sup>a</sup> | Variables              | Simple linear regression | Multivariate linear regression <sup>a</sup> |
| Handgrip strength (kg) |                          |                                             | Handgrip strength (kg) |                          |                                             |
| TG/HDL-C               |                          |                                             | TG/HDL-C               |                          |                                             |
| Quartile 1 (≤1.41)     | Reference                | Reference                                   | Quartile 1 (≤2.07)     | Reference                | Reference                                   |
| Quartile 2 (1.42-2.35) | -0.69 (-3.32, 1.93)      | -0.88 (-3.47, 1.71)                         | Quartile 2 (2.08-3.26) | 1.67 (-0.70, 4.04)       | 1.50 (-1.09, 4.09)                          |
| Quartile 3 (2.36-4.71) | 1.05 (-1.58, 3.68)       | -0.05 (-2.78, 2.67)                         | Quartile 3 (3.27-5.61) | 1.28 (-1.10, 3.67)       | 1.77 (-0.80, 4.34)                          |
| Quartile 4 (>4.71)     | 2.23 (-0.40, 4.86)       | -0.92 (-3.84, 2.00)                         | Quartile 4 (>5.61)     | 3.16 (0.78, 5.54)**      | 3.93 (0.89, 6.97)*                          |
| Gait speed (m/s)       |                          |                                             | Gait speed (m/s)       |                          |                                             |

|                                          |                        |                        |                                          |                       |                       |
|------------------------------------------|------------------------|------------------------|------------------------------------------|-----------------------|-----------------------|
| TG/HDL-C                                 |                        |                        | TG/HDL-C                                 |                       |                       |
| Quartile 1 ( $\leq 1.41$ )               | Reference              | Reference              | Quartile 1 ( $\leq 2.07$ )               | Reference             | Reference             |
| Quartile 2 (1.42-2.35)                   | -0.017 (-0.089, 0.056) | 0.001 (-0.074, 0.076)  | Quartile 2 (2.08-3.26)                   | 0.025 (-0.039, 0.089) | 0.008 (-0.059, 0.075) |
| Quartile 3 (2.36-4.71)                   | -0.072 (-1.452, 0.001) | -0.046 (-0.126, 0.033) | Quartile 3 (3.27-5.61)                   | 0.009 (-0.056, 0.074) | 0.013 (-0.054, 0.079) |
| Quartile 4 ( $> 4.71$ )                  | 0.009 (-0.064, 0.081)  | 0.015 (-0.070, 0.100)  | Quartile 4 ( $> 5.61$ )                  | 0.047 (-0.018, 0.113) | 0.060 (-0.020, 0.139) |
| 5-time chair stand test (s)              |                        |                        | 5-time chair stand test (s)              |                       |                       |
| TG/HDL-C                                 |                        |                        | TG/HDL-C                                 |                       |                       |
| Quartile 1 ( $\leq 1.41$ )               | Reference              | Reference              | Quartile 1 ( $\leq 2.07$ )               | Reference             | Reference             |
| Quartile 2 (1.42-2.35)                   | 1.03 (-0.22, 2.27)     | 1.09 (-0.16, 2.33)     | Quartile 2 (2.08-3.26)                   | 0.16 (-1.34, 1.65)    | -0.13 (-1.73, 1.47)   |
| Quartile 3 (2.36-4.71)                   | 0.95 (-0.30, 2.20)     | 1.04 (-0.29, 2.36)     | Quartile 3 (3.27-5.61)                   | 0.51 (-1.01, 2.03)    | -0.13 (-1.71, 1.46)   |
| Quartile 4 ( $> 4.71$ )                  | 1.54 (0.30, 2.78)**    | 2.60 (1.19, 4.00)***   | Quartile 4 ( $> 5.61$ )                  | -0.41 (-1.93, 1.10)   | -0.50 (-2.37, 1.36)   |
| ASM/Ht <sup>2</sup> (kg/m <sup>2</sup> ) |                        |                        | ASM/Ht <sup>2</sup> (kg/m <sup>2</sup> ) |                       |                       |

1  
2  
3  
4  
5  
6  
7  
8  
9  
10  
11  
12  
13  
14  
15  
16  
17  
18  
19  
20  
21  
22  
23  
24  
25  
26  
27  
28  
29  
30  
31  
32  
33  
34  
35  
36  
37  
38  
39  
40  
41  
42  
43  
44  
45  
46

TG/HDL-C

TG/HDL-C

| Quartile 1 ( $\leq 1.41$ ) | Reference            | Reference            | Quartile 1 ( $\leq 2.07$ ) | Reference            | Reference           |
|----------------------------|----------------------|----------------------|----------------------------|----------------------|---------------------|
| Quartile 2 (1.42-2.35)     | 0.24 (0.15, 0.47)*   | 0.18 (0.04, 0.32)**  | Quartile 2 (2.08-3.26)     | 0.65 (0.41, 0.88)*** | 0.30 (0.12, 0.47)** |
| Quartile 3 (2.36-4.71)     | 0.58 (0.36, 0.81)*** | 0.18 (0.03, 0.32)*   | Quartile 3 (3.27-5.61)     | 0.59 (0.35, 0.82)*** | 0.28 (0.11, 0.45)** |
| Quartile 4 ( $> 4.71$ )    | 0.81 (0.59, 1.04)*** | 0.36 (0.20, 0.51)*** | Quartile 4 ( $> 5.61$ )    | 0.67 (0.43, 0.90)*** | 0.31 (0.10, 0.51)** |

510 a. Adjusted for median age, residence, education level, and history of smoking and drinking, overweight, diabetes management, SBP, DBP, plasma glucose, HbA1c,  
511 TC, LDL-C, hs-CRP, uric acid, and eGFR.

512 \*  $P < 0.05$ ; \*\*  $P < 0.01$ ; \*\*\*  $P < 0.001$ .

513 Abbreviations: TG/HDL-C: triglyceride to high-density lipoprotein cholesterol ratio; 95% CI: 95% confidence interval; ASM/Ht<sup>2</sup>: the height-adjusted muscle mass;  
514 SBP: systolic blood pressure; DBP: diastolic blood pressure; HbA1c: glycated hemoglobin; TC: total cholesterol; LDL-C: low-density lipoprotein cholesterol;  
515 hs-CRP: high-sensitivity C-reactive protein; eGFR: the estimated glomerular filtration rate.

516

STROBE Statement—Checklist of items that should be included in reports of *cohort studies*

|                              | Item No | Recommendation                                                                                                                                                                                    | Page No  |
|------------------------------|---------|---------------------------------------------------------------------------------------------------------------------------------------------------------------------------------------------------|----------|
| <b>Title and abstract</b>    | 1       | (a) Indicate the study's design with a commonly used term in the title or the abstract<br>(b) Provide in the abstract an informative and balanced summary of what was done and what was found     | 1<br>2-4 |
| <b>Introduction</b>          |         |                                                                                                                                                                                                   |          |
| Background/rationale         | 2       | Explain the scientific background and rationale for the investigation being reported                                                                                                              | 5-6      |
| Objectives                   | 3       | State specific objectives, including any prespecified hypotheses                                                                                                                                  | 6        |
| <b>Methods</b>               |         |                                                                                                                                                                                                   |          |
| Study design                 | 4       | Present key elements of study design early in the paper                                                                                                                                           | 6-11     |
| Setting                      | 5       | Describe the setting, locations, and relevant dates, including periods of recruitment, exposure, follow-up, and data collection                                                                   | 6-11     |
| Participants                 | 6       | (a) Give the eligibility criteria, and the sources and methods of selection of participants. Describe methods of follow-up                                                                        | 6-11     |
|                              |         | (b) For matched studies, give matching criteria and number of exposed and unexposed                                                                                                               | 6-11     |
| Variables                    | 7       | Clearly define all outcomes, exposures, predictors, potential confounders, and effect modifiers. Give diagnostic criteria, if applicable                                                          | 6-11     |
| Data sources/<br>measurement | 8*      | For each variable of interest, give sources of data and details of methods of assessment (measurement). Describe comparability of assessment methods if there is more than one group              | 6-11     |
| Bias                         | 9       | Describe any efforts to address potential sources of bias                                                                                                                                         | 6-11     |
| Study size                   | 10      | Explain how the study size was arrived at                                                                                                                                                         | 6-11     |
| Quantitative variables       | 11      | Explain how quantitative variables were handled in the analyses. If applicable, describe which groupings were chosen and why                                                                      | 6-11     |
| Statistical methods          | 12      | (a) Describe all statistical methods, including those used to control for confounding                                                                                                             | 6-11     |
|                              |         | (b) Describe any methods used to examine subgroups and interactions                                                                                                                               | 6-11     |
|                              |         | (c) Explain how missing data were addressed                                                                                                                                                       | 6-11     |
|                              |         | (d) If applicable, explain how loss to follow-up was addressed                                                                                                                                    | 6-11     |
|                              |         | (e) Describe any sensitivity analyses                                                                                                                                                             | 6-11     |
| <b>Results</b>               |         |                                                                                                                                                                                                   |          |
| Participants                 | 13*     | (a) Report numbers of individuals at each stage of study—eg numbers potentially eligible, examined for eligibility, confirmed eligible, included in the study, completing follow-up, and analysed | 11-15    |
|                              |         | (b) Give reasons for non-participation at each stage                                                                                                                                              | 11-15    |
|                              |         | (c) Consider use of a flow diagram                                                                                                                                                                | 11-15    |
| Descriptive data             | 14*     | (a) Give characteristics of study participants (eg demographic, clinical, social) and information on exposures and potential confounders                                                          | 11-15    |
|                              |         | (b) Indicate number of participants with missing data for each variable of interest                                                                                                               | 11-15    |
|                              |         | (c) Summarise follow-up time (eg, average and total amount)                                                                                                                                       | 11-15    |
| Outcome data                 | 15*     | Report numbers of outcome events or summary measures over time                                                                                                                                    | 11-15    |

|    |                          |    |                                                                                                                                                                                                              |       |
|----|--------------------------|----|--------------------------------------------------------------------------------------------------------------------------------------------------------------------------------------------------------------|-------|
| 1  | Main results             | 16 | (a) Give unadjusted estimates and, if applicable, confounder-adjusted estimates and their precision (eg, 95% confidence interval). Make clear which confounders were adjusted for and why they were included | 11-15 |
| 2  |                          |    | (b) Report category boundaries when continuous variables were categorized                                                                                                                                    | 11-15 |
| 3  |                          |    | (c) If relevant, consider translating estimates of relative risk into absolute risk for a meaningful time period                                                                                             | 11-15 |
| 4  |                          |    |                                                                                                                                                                                                              |       |
| 5  |                          |    |                                                                                                                                                                                                              |       |
| 6  |                          |    |                                                                                                                                                                                                              |       |
| 7  |                          |    |                                                                                                                                                                                                              |       |
| 8  |                          |    |                                                                                                                                                                                                              |       |
| 9  | Other analyses           | 17 | Report other analyses done—eg analyses of subgroups and interactions, and sensitivity analyses                                                                                                               | 11-15 |
| 10 |                          |    |                                                                                                                                                                                                              |       |
| 11 | <b>Discussion</b>        |    |                                                                                                                                                                                                              |       |
| 12 |                          |    |                                                                                                                                                                                                              |       |
| 13 | Key results              | 18 | Summarise key results with reference to study objectives                                                                                                                                                     | 15-18 |
| 14 | Limitations              | 19 | Discuss limitations of the study, taking into account sources of potential bias or imprecision. Discuss both direction and magnitude of any potential bias                                                   | 18    |
| 15 |                          |    |                                                                                                                                                                                                              |       |
| 16 | Interpretation           | 20 | Give a cautious overall interpretation of results considering objectives, limitations, multiplicity of analyses, results from similar studies, and other relevant evidence                                   | 15-18 |
| 17 |                          |    |                                                                                                                                                                                                              |       |
| 18 |                          |    |                                                                                                                                                                                                              |       |
| 19 | Generalisability         | 21 | Discuss the generalisability (external validity) of the study results                                                                                                                                        | 18    |
| 20 |                          |    |                                                                                                                                                                                                              |       |
| 21 | <b>Other information</b> |    |                                                                                                                                                                                                              |       |
| 22 | Funding                  | 22 | Give the source of funding and the role of the funders for the present study and, if applicable, for the original study on which the present article is based                                                | 18-19 |
| 23 |                          |    |                                                                                                                                                                                                              |       |
| 24 |                          |    |                                                                                                                                                                                                              |       |

25  
26 \*Give information separately for exposed and unexposed groups.

27  
28 **Note:** An Explanation and Elaboration article discusses each checklist item and gives methodological background and  
29 published examples of transparent reporting. The STROBE checklist is best used in conjunction with this article (freely  
30 available on the Web sites of PLoS Medicine at <http://www.plosmedicine.org/>, Annals of Internal Medicine at  
31 <http://www.annals.org/>, and Epidemiology at <http://www.epidem.com/>). Information on the STROBE Initiative is  
32 available at <http://www.strobe-statement.org>.  
33  
34  
35  
36  
37  
38  
39  
40  
41  
42  
43  
44  
45  
46  
47  
48  
49  
50  
51  
52  
53  
54  
55  
56  
57  
58  
59  
60

# BMJ Open

## Association between serum triglyceride to high-density lipoprotein cholesterol ratio and sarcopenia among elderly patients with diabetes: A secondary data analysis of the China Health and Retirement Longitudinal Study

|                                 |                                                                                                                                                                                                                                            |
|---------------------------------|--------------------------------------------------------------------------------------------------------------------------------------------------------------------------------------------------------------------------------------------|
| Journal:                        | <i>BMJ Open</i>                                                                                                                                                                                                                            |
| Manuscript ID                   | bmjopen-2023-075311.R1                                                                                                                                                                                                                     |
| Article Type:                   | Original research                                                                                                                                                                                                                          |
| Date Submitted by the Author:   | 17-Jul-2023                                                                                                                                                                                                                                |
| Complete List of Authors:       | Lin, Yinghe; Guangzhou Panyu Central Hospital, Department of Endocrinology<br>Zhong, Shanshan; Guangzhou Panyu Central Hospital, Department of Endocrinology<br>Sun, Zhihua; Guangzhou Panyu Central Hospital, Department of Endocrinology |
| <b>Primary Subject Heading</b>: | Diabetes and endocrinology                                                                                                                                                                                                                 |
| Secondary Subject Heading:      | Diabetes and endocrinology, Geriatric medicine, Nutrition and metabolism                                                                                                                                                                   |
| Keywords:                       | Lipid disorders < DIABETES & ENDOCRINOLOGY, Diabetes & endocrinology < INTERNAL MEDICINE, DIABETES & ENDOCRINOLOGY                                                                                                                         |
|                                 |                                                                                                                                                                                                                                            |

SCHOLARONE™  
Manuscripts



I, the Submitting Author has the right to grant and does grant on behalf of all authors of the Work (as defined in the below author licence), an exclusive licence and/or a non-exclusive licence for contributions from authors who are: i) UK Crown employees; ii) where BMJ has agreed a CC-BY licence shall apply, and/or iii) in accordance with the terms applicable for US Federal Government officers or employees acting as part of their official duties; on a worldwide, perpetual, irrevocable, royalty-free basis to BMJ Publishing Group Ltd ("BMJ") its licensees and where the relevant Journal is co-owned by BMJ to the co-owners of the Journal, to publish the Work in this journal and any other BMJ products and to exploit all rights, as set out in our [licence](#).

The Submitting Author accepts and understands that any supply made under these terms is made by BMJ to the Submitting Author unless you are acting as an employee on behalf of your employer or a postgraduate student of an affiliated institution which is paying any applicable article publishing charge ("APC") for Open Access articles. Where the Submitting Author wishes to make the Work available on an Open Access basis (and intends to pay the relevant APC), the terms of reuse of such Open Access shall be governed by a Creative Commons licence – details of these licences and which [Creative Commons](#) licence will apply to this Work are set out in our licence referred to above.

Other than as permitted in any relevant BMJ Author's Self Archiving Policies, I confirm this Work has not been accepted for publication elsewhere, is not being considered for publication elsewhere and does not duplicate material already published. I confirm all authors consent to publication of this Work and authorise the granting of this licence.

1  
2  
3  
4  
5 1 **Title Page**  
6  
7

8 2 **Article Title:** Association between serum triglyceride to high-density lipoprotein  
9  
10 3 cholesterol ratio and sarcopenia among elderly patients with diabetes: A secondary  
11  
12 4 data analysis of the China Health and Retirement Longitudinal Study  
13  
14  
15  
16  
17 5

18  
19  
20 6 **Authors:** Yinghe Lin<sup>1†\*</sup>, Shanshan Zhong<sup>1†</sup>, Zhihua Sun<sup>1\*</sup>  
21  
22

23  
24 7 1.Department of Endocrinology, Panyu Central Hospital, Guangzhou, China.  
25  
26

27  
28 8 †These authors share first authorship.  
29  
30

31 9 \* Correspondence:  
32  
33

34  
35 10 Yinghe Lin:linyinghe0714@qq.com  
36  
37

38 11 Zhihua Sun:sunzhihua2002@126.com  
39  
40  
41  
42  
43  
44  
45  
46  
47  
48  
49  
50  
51  
52  
53  
54  
55  
56  
57  
58  
59 17  
60



1  
2  
3  
4 18 **Abstract**

5  
6  
7  
8 19 **Objective:** Previous studies investigating the association between the serum  
9  
10 20 triglyceride to high-density lipoprotein cholesterol (TG/HDL-C) ratio and the  
11  
12 21 occurrence of sarcopenia in different populations have yielded inconsistent results.  
13  
14 22 This study aimed to investigate the potential association between TG/HDL-C ratio  
15  
16 23 and sarcopenia among elderly Chinese patients with diabetes.  
17  
18  
19

20  
21 24 **Design:** A secondary data analysis.  
22  
23

24  
25 25 **Setting:** This was a secondary analysis of data from the China Health and Retirement  
26  
27 26 Longitudinal Study (CHARLS).  
28  
29

30  
31 27 **Participants:** In this study, 752 elderly individuals with diabetes were included after  
32  
33 28 excluding individuals aged <60 years old, those with missing data for the assessment  
34  
35 29 of sarcopenia, and missing measurements for plasma glucose or glycated hemoglobin.  
36  
37  
38

39  
40 30 **Outcome measures:** The primary information included TG/HDL-C ratio, muscle  
41  
42 31 strength, physical performance, muscle mass, and covariables. The association  
43  
44 32 between TG/HDL-C ratio and sarcopenia was assessed using ordinal logistic  
45  
46 33 regression and linear regression analysis..  
47  
48  
49

50  
51 34 **Results:** On multivariate ordinal logistic regression, among male patients, compared  
52  
53 35 to those with the lowest quartile of TG/HDL-C ratio ( $\leq 1.41$ ), those with the highest  
54  
55 36 quartile ( $> 4.71$ ) had a significantly lower risk of more severe sarcopenia (odds ratio  
56  
57 37 [OR] 0.24, 95% confidence interval [CI] 0.10–0.54). Similarly, among female  
58  
59  
60

1  
2  
3  
4 38 patients, compared to those with the lowest quartile of TG/HDL-C ratio ( $\leq 2.07$ ), those  
5  
6  
7 39 with the highest quartile ( $> 5.61$ ) had a significantly lower risk of more severe  
8  
9 40 sarcopenia (OR 0.17, 95% CI 0.07–0.44). In multivariate linear regression, male  
10  
11 41 patients with the highest quartile of TG/HDL-C ratio ( $\beta=0.36$ , 95% CI 0.20–0.51) had  
12  
13 42 higher muscle mass than those with the lowest quartile. Similarly, female patients  
14  
15 43 with the highest quartile of TG/HDL-C ratio ( $\beta=0.31$ , 95% CI 0.10–0.51) had higher  
16  
17 44 muscle mass than those with the lowest quartile.  
18  
19  
20  
21  
22

23 45 **Conclusions:** There was a negative association between TG/HDL-C ratio categorized  
24  
25 46 by quartile and sarcopenia, which indicates that a higher TG/HDL-C ratio may be  
26  
27 47 related to better muscle status.  
28  
29  
30

31  
32 48 **Keywords:** sarcopenia; triglyceride; high-density lipoprotein cholesterol; diabetes;  
33  
34 49 elderly patient.  
35  
36  
37  
38  
39  
40  
41  
42  
43  
44  
45  
46  
47  
48  
49  
50  
51  
52  
53  
54  
55  
56  
57  
58  
59  
60

1  
2  
3  
4 **57 Strengths and limitations of this study**  
5  
6  
7

8 **1.** We investigated on the correlation between lipid profile and the various parameters  
9  
10  
11 for the assessment of sarcopenia (muscle strength, physical performance, and muscle  
12  
13 mass) in elderly patients with diabetes.  
14

15  
16  
17 **2.** Unlike previous studies, this study focused on elderly Chinese patients with  
18  
19 diabetes, supplementing the existing literature on this subject.  
20  
21

22  
23 **3.** The cross-sectional study design does not permit causal inferences.  
24  
25

26  
27 **4.** The type of diabetes was uncertain because the diagnosis of diabetes was based on  
28  
29 self-report and measurement of blood glucose and HbA1c.  
30  
31

32  
33 66  
34  
35

36  
37 67  
38  
39

40  
41 68  
42  
43

44  
45 69  
46  
47

48  
49 70  
50  
51

52  
53 71  
54  
55

56  
57 72  
58  
59

60  
61 73  
62

## 74 **1. Introduction**

75 Sarcopenia is a syndrome characterized by age-related loss of muscle mass, along  
76 with low muscle strength and/or inadequate physical performance [1]. The condition  
77 increases the risk of various adverse outcomes, including falls, physical limitations,  
78 frailty, hospitalization, and mortality [2-7]. According to a previous study, the  
79 prevalence of sarcopenia ranges from 1% to 29% in community-dwelling populations  
80 and 14 to 33% in individuals requiring long-term care [8]. Recently, various working  
81 groups have updated their consensus criteria to identify sarcopenia based on the  
82 combination of loss of muscle strength, function, and mass [1,4]. However, in routine  
83 clinical practice, most clinicians remain unaware of the condition and its diagnostic  
84 strategies [3].

85 Diabetes mellitus and sarcopenia have a bidirectional relationship [9,10]. In elderly  
86 patients with diabetes, decline in exercise capacity has been recognized as a new  
87 complication [11]. Conversely, because skeletal muscle plays an important role in  
88 insulin-mediated glucose disposal, sarcopenia may increase the risk of diabetes in  
89 older people [9]. Serum triglyceride to high-density lipoprotein cholesterol ratio  
90 (TG/HDL-C), a combination of lipid metabolic indicators, has been found to be  
91 associated with insulin resistance [12-14]. Therefore, recent studies have investigated  
92 TG/HDL-C ratio as a potential screening marker for sarcopenia; however, the  
93 TG/HDL-C ratio has shown an inconsistent association with the occurrence of  
94 sarcopenia in elderly Korean men and community-dwelling Chinese adults [15,16]. In

1  
2  
3  
4 95 consequence, the relevant conclusion cannot be extrapolated to elderly patients with  
5  
6  
7 96 diabetes.  
8  
9

10 97 Besides, an inappropriate burden of inflammation also plays a role in the pathogenesis  
11  
12  
13 98 of sarcopenia [1]. HDL cholesterol-based markers have attracted much attention in  
14  
15  
16 99 recent years and several studies have reported their relationships with various  
17  
18  
19 100 inflamamtory [17,18] and metabolic conditions, including diabetes [19] and its  
20  
21  
22 101 complications [20]. Therefore, in this study, we aimed to investigate the potential  
23  
24  
25 102 association between TG/HDL-C ratio and sarcopenia among elderly patients with  
26  
27  
28 103 diabetes, including muscle strength, physical performance, and muscle mass.

## 104 **2. Materials and methods**

### 105 **2.1 Study population**

106 This study used data from the China Health and Retirement Longitudinal Study  
107 (CHARLS), an ongoing nationally representative survey of middle-aged and elderly  
108 individuals in China. Detailed information on the CHARLS is available elsewhere  
109 [21]. Briefly, the CHARLS collects data through face-to-face interviews, using a  
110 structured questionnaire, from a nationally representative sample of the Chinese  
111 population aged  $\geq 45$  years, selected using multistage stratified  
112 probability-proportionate-to-size sampling. The survey mainly collects data on  
113 sociodemographics variables, lifestyle-related factors, and health-related information.  
114 Besides, the CHARLS includes various physical measurements and blood sample  
115 collection. The baseline survey was conducted in 2011, and all participants were

1  
2  
3  
4 116 followed up every 2 to 3 years. New participants are additionally enrolled in each  
5  
6  
7 117 follow-up survey.  
8  
9

10 118 The CHARLS protocol was conducted following the Declaration of Helsinki and  
11  
12  
13 119 approved by the Biomedical Ethical Review Committee of the Peking University  
14  
15  
16 120 (IRB00001052-11015). All participants provided informed consent. The CHARLS  
17  
18 121 datasets are available on request from the study home page (<http://charls.pku.edu.cn/>).  
19

20  
21 122 Our group selected the baseline participants in CHARLS 2011 (n=17,708) and  
22  
23  
24 123 non-repetitive participants in CHARLS 2015 (n=3823). Of these, 20,779 individuals  
25  
26  
27 124 were excluded due to following reasons: (1) age <60 years (n=13,661); (2) missing  
28  
29  
30 125 information on physical measurements required for the assessment of sarcopenia  
31  
32 126 (n=2024); (3) non-diabetes patients, or those with missing plasma glucose or glycated  
33  
34  
35 127 hemoglobin (HbA1c) measurements (n=5094). Finally, 752 participants were eligible  
36  
37 128 for this cross-sectional analysis.  
38  
39

40  
41 129 In this study, diabetes was defined as fasting plasma glucose (FPG)  $\geq 7.0$  mmol/L (126  
42  
43 130 mg/dL), random plasma glucose (RPG)  $\geq 11.1$  mmol/L (200 mg/dL), HbA1c  $\geq 6.5\%$ ,  
44  
45  
46 131 or self-reported history [22].  
47  
48

## 49 132 **2.2 Data collection**

50  
51  
52  
53 133 In the CHARLS, information on demographic factors (including age and sex),  
54  
55  
56 134 residence (urban or rural), education level (less than lower secondary, upper  
57  
58 135 secondary or vocational training, or tertiary), health behaviors (including the history  
59  
60

1  
2  
3  
4 136 of smoking and drinking) and diabetes management (including awareness and  
5  
6  
7 137 treatment of diabetes) were obtained using a structured questionnaire.  
8  
9

10 138 The main anthropometric parameters in our study were height and body weight. The  
11  
12  
13 139 body mass index (BMI,  $\text{kg/m}^2$ ) was calculated as body weight/(height<sup>2</sup>), and  
14  
15  
16 140 overweight was defined as a BMI  $\geq 25$   $\text{kg/m}^2$ . Systolic blood pressure (SBP) and  
17  
18  
19 141 diastolic blood pressure (DBP) were measured three times, and their mean values  
20  
21 142 were recorded.  
22  
23

24 143 Blood samples were collected for measurements of plasma glucose (mg/dL), HbA1c  
25  
26  
27 144 (%), total cholesterol (TC, mg/dL), TG, low-density lipoprotein cholesterol (LDL-C,  
28  
29  
30 145 mg/dL), HDL-C (mg/dL), high-sensitivity C-reactive protein (hs-CRP, mg/L), uric  
31  
32  
33 146 acid (mg/dL), and creatinine (mg/dL). Serum triglyceride to HDL-C ratio, the primary  
34  
35 147 variable in this study, was calculated as TG/HDL-C. The estimated glomerular  
36  
37  
38 148 filtration rate (eGFR,  $\text{mL/min/1.73 m}^2$ ) was calculated based on the Chronic Kidney  
39  
40 149 Disease Epidemiology Collaboration's 2009 creatinine equation [23].  
41  
42

### 43 150 **2.3 Assessment of sarcopenia**

44  
45  
46

47 151 In this study, sarcopenia status was assessed according to the algorithm of the Asian  
48  
49  
50 152 Working Group for Sarcopenia 2019 (AWGS 2019) [1]. Participants with adequate  
51  
52  
53 153 muscle strength and physical performance were considered to have no sarcopenia.  
54  
55  
56 154 Possible sarcopenia was diagnosed if participants had sufficient muscle mass, but with  
57  
58 155 low muscle strength or low physical performance. Participants had low muscle mass,  
59  
60

1  
2  
3  
4 156 with low muscle strength or low physical performance, were considered as having  
5  
6  
7 157 sarcopenia.  
8  
9

### 10 158 **2.3.1 Muscle strength**

11  
12  
13  
14 159 Handgrip strength (kg) was used to assess muscle strength according to the AWGS  
15  
16 160 2019 [1]. In the CHARLS, handgrip strength was measured both with the left and  
17  
18  
19 161 right hand twice, and we took the average of the maximum values. If participants  
20  
21  
22 162 could not perform grip strength measurements in both hands, the data of the available  
23  
24  
25 163 hand was used. The cut-off points for low handgrip strength recommended by AWGS  
26  
27 164 2019 were <28 kg in men and <18 kg in women [1].  
28  
29

### 30 165 **2.3.2 Physical performance**

31  
32  
33  
34 166 This study measured physical performance by gait speed and 5-time chair stand test.  
35  
36  
37 167 In the CHARLS, researchers recorded the number of seconds taken by the participants  
38  
39  
40 168 to walk 2.5 meters [21], and we converted it to gait speed (m/s). In the 5-time chair  
41  
42  
43 169 stand test, the participants were required to keep their arms folded across their chest,  
44  
45 170 while sitting on a chair, then stand up straight and then sit down again five times [21];  
46  
47  
48 171 the number of seconds spent by the participants was recorded. According to the  
49  
50 172 AWGS 2019, gait speed <1.0 m/s or 5-time chair stand test  $\geq 12$  seconds is regarded  
51  
52  
53 173 as low physical performance [1]. In our analysis, participants who tried but failed to  
54  
55 174 perform either of the tests were also considered to have low physical performance.  
56  
57

### 58 175 **2.3.3 Skeletal muscle mass measurement**



1  
2  
3  
4 176 Based on the AWGS 2019, the muscle mass was estimated by the appendicular  
5  
6  
7 177 skeletal muscle mass (ASM). In this study, we used a previously validated  
8  
9  
10 178 anthropometric equation in a Chinese population to calculate the ASM [24]:

11  
12 179 
$$ASM = 0.193 \times \text{body weight} + 0.107 \times \text{height} - 4.157 \times \text{sex} - 0.037 \times \text{age} - 2.631$$

13  
14  
15 180 The body weight, height, and age were measured in kilograms, centimeters, and years,  
16  
17  
18 181 respectively. For sex, the value 1 was assigned for men and the value 2 was assigned  
19  
20  
21 182 for women.

22  
23  
24 183 The parameter used to assess muscle mass in our study, was the height-adjusted  
25  
26  
27 184 muscle mass. It was calculated as the ASM divided by the square of the height in  
28  
29  
30 185 meters (ASM/height<sup>2</sup>). Following previous studies [25], the cut-off point for low  
31  
32  
33 186 muscle mass was the lowest 20% of the height-adjusted muscle mass in our study  
34  
35  
36 187 population. Finally, the ASM/height<sup>2</sup> values of <6.99 kg/m<sup>2</sup> in men and <5.24 kg/m<sup>2</sup>  
37  
38  
39 188 in women were considered low muscle mass.

40  
41 189 **2.4 Statistical analysis**

42  
43  
44 190 In this study, statistical analyses were performed separately for men and women. The  
45  
46  
47 191 Kolmogorov-Smirnov test was used to assess the normality of distribution of  
48  
49  
50 192 continuous variables. Normally distributed continuous variables were described as  
51  
52  
53 193 mean ± standard deviation (SD), while non-normally distributed continuous variables  
54  
55  
56 194 were described as median (interquartile range [IQR]). Categorical variables were  
57  
58  
59 195 expressed as frequency (percentage). First, differences in baseline characteristics  
60 196 among the three groups (no sarcopenia, possible sarcopenia, and sarcopenia) were

1  
2  
3  
4 197 compared using one-way ANOVA, chi-square test, Fisher's exact test, or Kruskal–  
5  
6  
7 198 Wallis test, as appropriate. Second, ordinal logistic regression analysis was performed  
8  
9  
10 199 to assess the association between TG/HDL-C ratio and sarcopenia status. Four  
11  
12 200 different models were introduced: Model 1, without adjustment; Model 2, adjusted for  
13  
14 201 median age; Model 3, additionally adjusted for residence, education level, and history  
15  
16  
17 202 of smoking and alcohol consumption; and Model 4, additionally adjusted for  
18  
19  
20 203 overweight, diabetes management, SBP, DBP, plasma glucose, HbA1c, TC, LDL-C,  
21  
22 204 hs-CRP, uric acid, and eGFR. Third, linear regression analysis was performed to  
23  
24  
25 205 estimate the associations between TG/HDL-C ratio and muscle strength, physical  
26  
27 206 performance, and muscle mass, respectively, with or without adjustment for  
28  
29  
30 207 covariates. The main variable was serum TG/HDL-C, categorized and analyzed  
31  
32  
33 208 according to quartiles. Given the difference in muscle between men and women, all  
34  
35  
36 209 analyses were stratified by sex. Two-sided *P* values <0.05 were considered indicative  
37  
38 210 of statistical significance for all analyses. All statistical analyses were conducted  
39  
40  
41 211 using Stata 17.0 (StataCorp, College Station, TX, USA).

## 212 **2.5 Patient and public involvement**

213 Patients and/or the public were not directly involved in this study.

## 214 **3. Results**

### 215 **3.1 Baseline**

1  
2  
3  
4 216 Table 1 showed the baseline characteristics of the study population disaggregated by  
5  
6  
7 217 sarcopenia status. The median (interquartile range) age was 66.0 (62.5, 72.0) years  
8  
9 218 and 384 (51.1%) of subjects were female. The prevalence of no sarcopenia, possible  
10  
11 219 sarcopenia, and sarcopenia in this cohort was 6.5% (49/752), 74.1% (557/752) and  
12  
13  
14 220 19.4% (146/752), respectively.

15  
16  
17  
18 221 Table 2 showed the baseline characteristics of male subjects according to sarcopenia  
19  
20 222 status. There were 7.9% (29/368) male participants without sarcopenia, 72.8%  
21  
22 223 (268/368) with possible sarcopenia, and 19.3% (71/368) with sarcopenia. There were  
23  
24  
25 224 significant differences among the three groups concerning the following continuous  
26  
27 225 variables: age ( $P<0.001$ ), BMI ( $P<0.001$ ), SBP ( $P=0.011$ ), DBP ( $P=0.007$ ), HbA1c  
28  
29 226 ( $P=0.007$ ), TC ( $P=0.006$ ), TG ( $P=0.001$ ), LDL-C ( $P=0.002$ ), HDL-C ( $P<0.001$ ), uric  
30  
31 227 acid ( $P=0.024$ ), and TG/HDL-C ratio ( $P<0.001$ ). The levels of plasma glucose  
32  
33 228 ( $P=0.763$ ), hs-CRP ( $P=0.470$ ), and eGFR ( $P=0.349$ ) showed no significant difference  
34  
35 229 among the different groups based on sarcopenia status. The distributions of median  
36  
37 230 age ( $P=0.001$ ), residence ( $P=0.001$ ), overweight ( $P=0.349$ ), awareness of diabetes  
38  
39 231 ( $P=0.038$ ), and TG/HDL-C ratio ( $P<0.001$ ) showed significant differences among the  
40  
41 232 three groups. There was no significant difference among the classifications of  
42  
43 233 sarcopenia with respect to the education level ( $P=0.119$ ), treatment of diabetes  
44  
45 234 ( $P=0.072$ ), and history of smoking ( $P=0.384$ ) and drinking ( $P=0.099$ ).

46  
47  
48  
49 235 The baseline characteristics of female subjects according to sarcopenia status were  
50  
51 236 presented in Table 3. In this study, 5.2% (20/384) female participants were defined as  
52  
53  
54  
55  
56  
57  
58  
59  
60

1  
2  
3  
4 237 having no sarcopenia, 75.3% (289/384) as having possible sarcopenia, and 19.5%  
5  
6  
7 238 (75/384) as having sarcopenia. There were no significant differences between the 3  
8  
9 239 groups with respect to age ( $P<0.001$ ), BMI ( $P<0.001$ ), HbA1c ( $P=0.002$ ), TG  
10  
11 240 ( $P<0.001$ ), HDL-C ( $P<0.001$ ), hs-CRP ( $P=0.009$ ), uric acid ( $P=0.001$ ), and  
12  
13 241 TG/HDL-C ratio ( $P<0.001$ ). There were no significant differences among the grades  
14  
15 242 of sarcopenia concerning SBP ( $P=0.621$ ), DBP ( $P=0.337$ ), plasma glucose ( $P=0.205$ ),  
16  
17 243 TC ( $P=0.389$ ), LDL-C ( $P=0.629$ ), and eGFR ( $P=0.090$ ). However, there were  
18  
19 244 significant differences between the three groups with respect to age ( $P=0.021$ ),  
20  
21 245 residence ( $P<0.001$ ), education level ( $P=0.032$ ), overweight ( $P<0.001$ ), awareness  
22  
23 246 ( $P<0.001$ ) and treatment ( $P=0.008$ ) of diabetes, and TG/HDL-C ratio ( $P<0.001$ ).  
24  
25 247 There were no significant differences with respect to the distributions of history of  
26  
27 248 smoking ( $P=1.000$ ) and drinking ( $P=0.068$ ).  
28  
29  
30  
31  
32  
33  
34  
35  
36 249 The detailed data were shown in Table 1-3.

### 3.2 Association between TG/HDL-C ratio and sarcopenia

37  
38  
39  
40  
41  
42  
43 251 Among male participants, compared to those with quartile 1 of TG/HDL-C ratio  
44  
45 252 ( $\leq 1.41$ ), those with quartile 2 (1.42–2.35; OR 0.49, 95% CI 0.26–0.92,  $P=0.027$ ), 3  
46  
47 253 (2.36–4.71; OR 0.36, 95% CI 0.19–0.69,  $P=0.002$ ), and 4 ( $>4.71$ ; OR 0.18, 95% CI  
48  
49 254 0.09–0.35,  $P<0.001$ ) of TG/HDL-C ratio had significantly lower odds ratio of more  
50  
51 255 severe sarcopenia in the unadjusted ordinal logistic regression (Model 1). In the  
52  
53 256 multi-variable-adjusted model (Model 4), compared with male participants with  
54  
55 257 quartile 1 of TG/HDL-C ratio ( $\leq 1.41$ ), those with quartile 2 (1.42–2.35; OR 0.48,

258 95% CI 0.24–0.97,  $P=0.042$ ) and 4 ( $>4.71$ ; OR 0.24, 95% CI 0.10–0.54,  $P=0.001$ ) of  
259 TG/HDL-C ratio had significantly lower risk of more severe sarcopenia.

260 Similarly, among female participants, compared to those with quartile 1 of  
261 TG/HDL-C ratio ( $\leq 2.07$ ), those with quartile 2 (2.08–3.26; OR 0.24, 95% CI 0.12–  
262 0.46,  $P<0.001$ ), 3 (3.27–5.61; OR 0.36, 95% CI 0.13–0.50,  $P<0.001$ ), and 4 ( $>5.61$ ;  
263 OR 0.17, 95% CI 0.08–0.33,  $P<0.001$ ) of TG/HDL-C ratio had significantly lower  
264 risk of more severe sarcopenia, in the unadjusted ordinal logistic regression (Model  
265 1). In the multi-variable-adjusted model (Model 4), female participants with quartile 2  
266 (2.08–3.26; OR 0.38, 95% CI 0.17–0.83,  $P=0.015$ ), 3 (3.27–5.61; OR 0.26, 95% CI  
267 0.12–0.57,  $P=0.001$ ), and 4 ( $>5.61$ ; OR 0.17, 95% CI 0.07–0.44,  $P<0.001$ ) of  
268 TG/HDL-C ratio had significantly lower risk of more severe sarcopenia, compared to  
269 those with quartile 1 of TG/HDL-C ratio ( $\leq 2.07$ ).

270 The detailed results and other adjusted models (model 2 and model 3), were shown in  
271 Table 4.

### 272 3.3 Associations between TG/HDL-C ratio and components of sarcopenia

273 Among male participants, simple and multivariate linear regression analysis showed  
274 that TG/HDL-C ratio categorized by quartile had no significant correlation with  
275 handgrip strength and gait speed. In the 5-time chair stand test, compared with  
276 quartile 1 of TG/HDL-C ratio ( $\leq 1.41$ ), quartile 4 of TG/HDL-C ratio ( $>4.71$ ) was  
277 associated with significantly longer chair-rising time in simple ( $\beta=1.54$ , 95% CI 0.30–  
278 2.78,  $P=0.015$ ) and multivariate ( $\beta=2.60$ , 95% CI 1.19–4.00,  $P<0.001$ ) linear

1  
2  
3  
4 279 regression. On simple and multivariate linear regression analysis, TG/HDL-C ratio  
5  
6  
7 280 categorized by quartile show a significant correlation with muscle mass. In  
8  
9  
10 281 multivariate linear regression analysis, compared with quartile 1 of TG/HDL-C ratio  
11  
12 282 ( $\leq 1.41$ ), quartile 2 (1.42–2.35;  $\beta=0.18$ , 95% CI 0.04–0.32,  $P=0.009$ ), 3 (2.36–4.71;  
13  
14 283  $\beta=0.18$ , 95% CI 0.03–0.32,  $P=0.016$ ), and 4 ( $>4.71$ ;  $\beta=0.36$ , 95% CI 0.20–0.51,  
15  
16  
17 284  $P<0.001$ ) of TG/HDL-C ratio showed a significant association with high  
18  
19  
20 285 height-adjusted muscle mass (ASM/height<sup>2</sup>).

21  
22  
23 286 Unlike male participants, compared with female participants in quartile 1 of  
24  
25  
26 287 TG/HDL-C ratio ( $\leq 2.07$ ), those in quartile 4 of TG/HDL-C ratio ( $>5.61$ ) had  
27  
28  
29 288 significantly greater handgrip strength in simple ( $\beta=3.16$ , 95% CI 0.78–5.54,  
30  
31 289  $P=0.009$ ) and multivariate ( $\beta=3.93$ , 95% CI 0.89–6.97,  $P=0.011$ ) linear regression.  
32  
33  
34 290 However, there was no significant correlation between TG/HDL-C ratio and gait  
35  
36  
37 291 speed, or the 5-time chair stand test. Similar to male participants, TG/HDL-C ratio  
38  
39  
40 292 categorized by quartile was correlated with muscle mass in linear regression analysis  
41  
42 293 among female participants. In multivariate linear regression analysis, compared with  
43  
44 294 quartile 1 of TG/HDL-C ratio ( $\leq 2.07$ ), quartile 2 (2.08–3.26;  $\beta=0.30$ , 95% CI 0.12–  
45  
46 295 0.47,  $P=0.001$ ), 3 (3.27–5.61;  $\beta=0.28$ , 95% CI 0.11–0.45,  $P=0.001$ ), and 4 ( $>5.61$ ;  
47  
48 296  $\beta=0.31$ , 95% CI 0.10–0.51,  $P=0.003$ ) of TG/HDL-C ratio were associated with  
49  
50  
51 297 significantly greater height-adjusted muscle mass (ASM/height<sup>2</sup>).

52  
53  
54  
55 298 Other detailed data were shown in Table 5.

56  
57  
58  
59 299 **4. Discussion**

1  
2  
3  
4 300 In this cohort, we found a negative association between TG/HDL-C ratio categorized  
5  
6  
7 301 by quartile and sarcopenia, which implies that higher TG/HDL-C ratio may be  
8  
9  
10 302 associated with better muscle status. Unlike previous studies [15,16], this study  
11  
12 303 focused on elderly Chinese patients with diabetes; thus, our findings supplement the  
13  
14 304 existing literature on this subject. In addition, our group further analyzed the  
15  
16  
17 305 correlation between TG/HDL-C ratio and specific components of sarcopenia,  
18  
19  
20 306 including muscle strength, physical performance, and muscle mass. The main results  
21  
22 307 were as follows: first, compared with the lowest quartile of TG/HDL-C ratio ( $\leq 1.41$ ),  
23  
24  
25 308 the highest quartile of TG/HDL-C ratio ( $> 4.71$ ) was associated with longer  
26  
27  
28 309 chair-rising time among male elderly diabetics; second, compared with the lowest  
29  
30  
31 310 quartile of TG/HDL-C ratio ( $\leq 2.07$ ), the highest quartile of TG/HDL-C ratio ( $> 5.61$ )  
32  
33  
34 311 was associated with greater handgrip strength among female elderly diabetics; third,  
35  
36  
37 312 high TG/HDL-C ratio categorized by quartile was correlated with increased muscle  
38  
39  
40 313 mass in both sexes. The above findings further underline the fact that, as a widely and  
41  
42  
43 314 rapidly accessible lipid parameter, TG/HDL-C ratio may serve as a marker of  
44  
45  
46 315 sarcopenia.

47 316 Consistent with the previous finding in community-dwelling Chinese populations  
48  
49  
50 317 [16], this study showed that higher TG/HDL-C ratio was associated with a lower risk  
51  
52  
53 318 of more severe sarcopenia in older patients with diabetes. Therefore, TG/HDL-C ratio  
54  
55  
56 319 can be considered as a risk factor for sarcopenia in elderly Chinese patients with  
57  
58  
59 320 diabetes. However, this finding was contrary to the Korean study [15] and the reason  
60  
321 for the conflicting results is unclear. Previous studies have shown that study design,

1  
2  
3  
4 322 gene diversity, lifestyle factors and disease advancement in different populations may  
5  
6  
7 323 lead to variations in lipid profiles [16,26]. First, this study followed AWGS 2019 for  
8  
9  
10 324 the evaluation of sarcopenia [1], while the Korean study was published before the  
11  
12 325 consensus [15], which may have lead to selection bias. Second, gene polymorphisms  
13  
14 326 affecting the lipid profiles in the Chinese and Koreans remains undefined but cannot  
15  
16  
17 327 be ignored, because a study reported significant difference in lipid profiles between  
18  
19  
20 328 the Chinese and Korean adolescents populations [27]. Third, unlike the Korean study  
21  
22 329 [15], this study was confined to elderly Chinese patients with diabetes, and the lipid  
23  
24  
25 330 profiles of diabetes patients differ from those of the general population [22], which  
26  
27  
28 331 may also be one of the reasons for the inconsistent results.

31 332 We observed some sex-based differences in the association between TG/HDL-C ratio  
32  
33 333 and muscle function of elderly diabetics in our study. Only among male elderly  
34  
35  
36 334 diabetics, we found that patients with the highest quartile of TG/HDL-C ratio ( $>4.71$ )  
37  
38  
39 335 had longer chair-rising time than those with the lowest quartile ( $\leq 1.41$ ). Another study  
40  
41  
42 336 using the CHARLS database also found similar results regarding the physical  
43  
44  
45 337 performance of participants with prediabetes ( $\geq 45$  years) [28]. This finding  
46  
47  
48 338 contradicted the main result, but the reason was unclear [28]. Further, we found that  
49  
50  
51 339 patients with the highest quartile of TG/HDL-C ratio ( $>5.61$ ) had greater muscle  
52  
53  
54 340 strength than those with the lowest quartile ( $\leq 2.07$ ), only among female elderly  
55  
56  
57 341 diabetics. Previous studies have found sex-based differences in the correlations  
58  
59  
60 342 between various metabolic indices and sarcopenia in different cohorts [29]. More  
343 in-depth researches may help us understand this phenomenon in the future.



1  
2  
3  
4 344 Conversely, the association between TG/HDL-C ratio and muscle mass in male and  
5  
6  
7 345 female elderly diabetics were consistent in this study. Regardless of sex, high quartile  
8  
9  
10 346 of TG/HDL-C ratio was correlated with increased muscle mass. Currently, AWGS  
11  
12 347 2019 recommends the use of dual-energy X-ray absorptiometry (DXA) or  
13  
14 348 multifrequency bioelectrical impedance analysis (BIA) for measuring muscle mass in  
15  
16  
17 349 sarcopenia diagnosis [1]. This finding suggested that TG/HDL-C ratio can be used as  
18  
19  
20 350 a relatively simple screening indicator for muscle mass and help clinicians identify  
21  
22 351 elderly diabetics at high risk of muscle mass deficiency. Compared with muscle  
23  
24  
25 352 strength and function, this closer relationship between TG/HDL-C ratio and muscle  
26  
27  
28 353 mass was supported by previous studies and attributed to their potential interactions  
29  
30 354 [15,16,26]. As a marker associated with insulin resistance, TG/HDL-C ratio may  
31  
32  
33 355 reflect the vicious cycle between sarcopenia and insulin resistance [15]. Sarcopenia is  
34  
35  
36 356 mainly characterized by a decrease in muscle mass along with an increase in  
37  
38 357 intramuscular fat. Since skeletal muscle plays an important role in insulin-mediated  
39  
40  
41 358 glucose disposal, lower skeletal muscle mass is likely to diminish this effect.  
42  
43  
44 359 Moreover, inappropriate secretion of adipokines by intramuscular fat may potentially  
45  
46  
47 360 lead to increased insulin resistance and sarcolysis. Muscle protein metabolism is  
48  
49  
50 361 influenced by insulin resistance, which promotes muscle sarcolysis resulting in loss of  
51  
52  
53 362 skeletal muscle mass.

54  
55 363 A recent study also found an association between TG/HDL-C ratio and diabetic  
56  
57 364 complications microvascular [30]. Similarly, our study proposed an easily accessible  
58  
59  
60 365 parameter for screening sarcopenia in elderly diabetic patients, which may facilitate

1  
2  
3  
4 366 the prevention and treatment of sarcopenia in people with diabetes. Recently,  
5  
6  
7 367 sarcopenia has been implicated as both a cause and consequence of diabetes [9,10].  
8  
9 368 However, there is insufficient evidence for treatment recommendations for diabetic  
10  
11  
12 369 patients with sarcopenia, including nutritional supplements, dietary advice, and  
13  
14  
15 370 planned exercise [9]. Therefore, future intervention studies (suitable TG  
16  
17  
18 371 supplementation and HDL-C control) for diabetic patients with sarcopenia can further  
19  
20  
21 372 investigate the interactions between lipid profile and sarcopenia and provide evidence  
22  
23  
24 373 for the prevention and treatment of sarcopenia.

25  
26 374 Some limitations of our study should be considered. First, the cross-sectional nature  
27  
28  
29 375 of the study does not permit any causal inferences. Second, this study only involved  
30  
31  
32 376 elderly patients with diabetes from the CHARLS, which may also have resulted in  
33  
34  
35 377 selection bias. Third, the type of diabetes was uncertain because the diagnosis of  
36  
37  
38 378 diabetes was based on self-report, and measurements of blood glucose and HbA1c.  
39  
40  
41 379 Fourth, comorbid conditions and history of drug use were not included in the analysis.  
42  
43  
44 380 Fifth, instead of the AWGS 2019 recommendation, we used a previously validated  
45  
46  
47 381 anthropometric equation to assess the muscle mass, which may also have led to  
48  
49  
50 382 measurement bias.

## 50 383 **5. Conclusions**

51  
52  
53  
54 384 In this study, we observed a negative association between TG/HDL-C ratio  
55  
56  
57 385 categorized by quartile and sarcopenia. Our findings indicate that higher TG/HDL-C  
58  
59  
60 386 ratio may be related to better muscle status. Future prospective and intervention

1  
2  
3  
4 387 studies are required to investigated the relationship between lipid profiles and the  
5  
6  
7 388 occurrence, prevention, and treatment of sarcopenia.  
8  
9

10 389 **6. Declarations**  
11  
12

13  
14 390 **Funding**  
15

16  
17 391 This research received no specific grant from any funding agency in the public,  
18  
19  
20 392 commercial or not-for-profit sectors.  
21  
22

23  
24 393 **Competing interests**  
25

26  
27 394 The authors declare that they have no competing interests.  
28  
29

30  
31 395 **Authors' contributions**  
32

33  
34 396 YL contributed to the study concept and design, data acquisition and analysis, and  
35  
36  
37 397 drafted the manuscript. SZ contributed to revising the manuscript. ZS contributed to  
38  
39  
40 398 providing technical and material support. ZS also contributed to the supervision of  
41  
42  
43 399 this study. All authors read and approved the final manuscript.  
44  
45

46 400 **Ethics approval and consent to participate**  
47

48  
49 401 The CHARLS protocol was conducted following the Declaration of Helsinki and  
50  
51  
52 402 approved by the Biomedical Ethical Review Committee of Peking University  
53  
54  
55 403 (IRB00001052-11015). All participants provided written informed consent.  
56  
57

58 404 **Availability of data and materials**  
59  
60

1  
2  
3  
4 405 The CHARLS datasets are available on request from their home page at  
5  
6  
7 406 <http://charls.pku.edu.cn/>.

8  
9  
10 407 **Acknowledgments**

11  
12  
13  
14 408 The authors would like to thank the National Development Institute of Peking  
15  
16 409 University and the Chinese Center for Social Sciences Survey of Peking University  
17  
18  
19 410 for providing the CHARLS data. Meanwhile, we would like to thank the every  
20  
21  
22 411 respondent for their efforts for the CHARLS project.

23  
24  
25 412 **References**

- 26  
27  
28  
29 413 1.Chen LK, Woo J, Assantachai P, et al. Asian Working Group for Sarcopenia: 2019  
30  
31 414 Consensus Update on Sarcopenia Diagnosis and Treatment. J Am Med Dir Assoc.  
32  
33 415 2020;21(3):300–307.e2. doi: 10.1016/j.jamda.2019.12.012.
- 34  
35  
36  
37 416 2.Zhang X, Huang P, Dou Q, et al. Falls among older adults with sarcopenia dwelling  
38  
39 417 in nursing home or community: A meta-analysis. Clin Nutr. 2020;39(1):33-39. doi:  
40  
41 418 10.1016/j.clnu.2019.01.002.
- 42  
43  
44  
45 419 3.Cruz-Jentoft AJ, Sayer AA. Sarcopenia. Lancet. 2019;393(10191):2636-2646. doi:  
46  
47 420 10.1016/S0140-6736(19)31138-9.
- 48  
49  
50  
51 421 4.Cruz-Jentoft AJ, Bahat G, Bauer J, et al. Sarcopenia: revised European consensus  
52  
53 422 on definition and diagnosis. Age Ageing. 2019;48(1):16-31. doi:  
54  
55 423 10.1093/ageing/afy169.
- 56  
57  
58  
59  
60

- 1  
2  
3  
4 424 5.Cawthon PM, Lui LY, Taylor BC, et al. Clinical Definitions of Sarcopenia and Risk  
5  
6  
7 425 of Hospitalization in Community-Dwelling Older Men: The Osteoporotic Fractures in  
8  
9 426 Men Study. *J Gerontol A Biol Sci Med Sci*. 2017;72(10):1383-1389. doi:  
10  
11 427 10.1093/gerona/glw327.  
12  
13  
14  
15 428 6.Woo J, Leung J, Morley JE. Defining sarcopenia in terms of incident adverse  
16  
17 429 outcomes. *J Am Med Dir Assoc*. 2015;16(3):247-252. doi:  
18  
19 430 10.1016/j.jamda.2014.11.013.  
20  
21  
22  
23  
24 431 7.Kitamura A, Seino S, Abe T, et al. Sarcopenia: prevalence, associated factors, and  
25  
26 432 the risk of mortality and disability in Japanese older adults. *J Cachexia Sarcopenia*  
27  
28 433 *Muscle*. 2021;12(1):30-38. doi: 10.1002/jcsm.12651.  
29  
30  
31  
32  
33 434 8.Cruz-Jentoft AJ, Landi F, Schneider SM, et al. Prevalence of and interventions for  
34  
35 435 sarcopenia in ageing adults: a systematic review. Report of the International  
36  
37 436 Sarcopenia Initiative (EWGSOP and IWGS). *Age Ageing*. 2014;43(6):748-759. doi:  
38  
39 437 10.1093/ageing/afu115.  
40  
41  
42  
43  
44 438 9.Mesinovic J, Zengin A, De Courten B, et al. Sarcopenia and type 2 diabetes mellitus:  
45  
46 439 a bidirectional relationship. *Diabetes Metab Syndr Obes*. 2019; 12:1057-1072. doi:  
47  
48 440 10.2147/DMSO.S186600.  
49  
50  
51  
52  
53 441 10.Wen CY, Lien AS, Jiang YD. Sarcopenia in elderly diabetes. *J Diabetes Investig*.  
54  
55 442 2022;13(6):944-946. doi: 10.1111/jdi.13752.  
56  
57  
58  
59  
60

- 1  
2  
3  
4 443 11.Wong E, Backholer K, Gearon E, et al. Diabetes and risk of physical disability in  
5  
6  
7 444 adults: a systematic review and meta-analysis. *Lancet Diabetes Endocrinol.*  
8  
9 445 2013;1(2):106-114. doi: 10.1016/S2213-8587(13)70046-9.  
10  
11  
12  
13 446 12.Li C, Ford ES, Meng YX, et al. Does the association of the triglyceride to  
14  
15 447 high-density lipoprotein cholesterol ratio with fasting serum insulin differ by  
16  
17 448 race/ethnicity?. *Cardiovasc Diabetol.* 2008;7:4. doi:10.1186/1475-2840-7-4.  
18  
19  
20  
21  
22 449 13.Kim JS, Kang HT, Shim JY, et al. The association between the triglyceride to  
23  
24 450 high-density lipoprotein cholesterol ratio with insulin resistance (HOMA-IR) in the  
25  
26 451 general Korean population: based on the National Health and Nutrition Examination  
27  
28 452 Survey in 2007-2009. *Diabetes Res Clin Pract.* 2012;97(1):132-138.  
29  
30 453 doi:10.1016/j.diabres.2012.04.022.  
31  
32  
33  
34  
35 454 14.Ren X, Chen ZA, Zheng S, et al. Association between Triglyceride to HDL-C  
36  
37 455 Ratio (TG/HDL-C) and Insulin Resistance in Chinese Patients with Newly Diagnosed  
38  
39 456 Type 2 Diabetes Mellitus. *PLoS One.* 2016;11(4):e0154345.  
40  
41 457 doi:10.1371/journal.pone.0154345.  
42  
43  
44  
45  
46  
47 458 15.Chung TH, Kwon YJ, Shim JY, et al. Association between serum triglyceride to  
48  
49 459 high-density lipoprotein cholesterol ratio and sarcopenia in elderly Korean males: The  
50  
51 460 Korean National Health and Nutrition Examination Survey. *Clin Chim Acta.* 2016;  
52  
53 461 463:165-168. doi: 10.1016/j.cca.2016.10.032.  
54  
55  
56  
57  
58  
59  
60

- 1  
2  
3  
4 462 16.Wang N, Chen M, Fang D. Relationship between serum triglyceride to  
5  
6  
7 463 high-density lipoprotein cholesterol ratio and sarcopenia occurrence rate in  
8  
9  
10 464 community-dwelling Chinese adults. *Lipids Health Dis.* 2020;19(1):248. doi:  
11  
12 465 10.1186/s12944-020-01422-4.  
13  
14  
15 466 17.Kosekli MA, Kurtkulagii O, Kahveci G, et al. The association between serum uric  
16  
17  
18 467 acid to high density lipoprotein-cholesterol ratio and non-alcoholic fatty liver disease:  
19  
20  
21 468 the abund study. *Rev Assoc Med Bras* (1992). 2021;67(4):549-554. doi:  
22  
23 469 10.1590/1806-9282.20201005.  
24  
25  
26  
27 470 18.Kurtkulagi O, Tel BMA, Kahveci G, et al. Hashimoto's thyroiditis is associated  
28  
29  
30 471 with elevated serum uric acid to high density lipoprotein-cholesterol ratio. *Rom J*  
31  
32 472 *Intern Med.* 2021;59(4):403-408. doi: 10.2478/rjim-2021-0023.  
33  
34  
35  
36 473 19.Aktas G, Kocak MZ, Bilgin S, et al. Uric acid to HDL cholesterol ratio is a strong  
37  
38  
39 474 predictor of diabetic control in men with type 2 diabetes mellitus. *Aging Male.*  
40  
41 475 2020;23(5):1098-1102. doi: 10.1080/13685538.2019.1678126.  
42  
43  
44  
45 476 20.Aktas G, Yilmaz S, Kantarci DB, et al. Is serum uric acid-to-HDL cholesterol ratio  
46  
47  
48 477 elevation associated with diabetic kidney injury? *Postgrad Med.* 2023;135(5):519-523.  
49  
50 478 doi: 10.1080/00325481.2023.2214058.  
51  
52  
53  
54 479 [dataset] 21.Zhao Y, Hu Y, Smith JP, et al. Cohort profile: the China Health and  
55  
56  
57 480 Retirement Longitudinal Study (CHARLS). *Int J Epidemiol.* 2014;43(1):61-68.  
58  
59 481 doi:10.1093/ije/dys203.  
60

- 1  
2  
3  
4 482 22.American Diabetes Association. Classification and Diagnosis of Diabetes:  
5  
6  
7 483 Standards of Medical Care in Diabetes-2020. *Diabetes Care*. 2020;43(Suppl  
8  
9 484 1):S14-S31. doi: 10.2337/dc20-S002.  
10  
11  
12  
13 485 23.Levey AS, Stevens LA, Schmid CH, et al. A new equation to estimate glomerular  
14  
15 486 filtration rate. *Ann Intern Med*. 2009; 150(9):604-612. doi:  
16  
17 487 10.7326/0003-4819-150-9-200905050-00006.  
18  
19  
20  
21 488 24.Wen X, Wang M, Jiang CM, et al. Anthropometric equation for estimation of  
22  
23 489 appendicular skeletal muscle mass in Chinese adults. *Asia Pac J Clin Nutr*. 2011;  
24  
25 490 20(4):551-556.  
26  
27  
28  
29  
30 491 25.Wu X, Li X, Xu M, et al. Sarcopenia prevalence and associated factors among  
31  
32 492 older Chinese population: Findings from the China Health and Retirement  
33  
34 493 Longitudinal Study. *PLoS One*. 2021;16(3):e0247617. doi:  
35  
36 494 10.1371/journal.pone.0247617.  
37  
38  
39  
40  
41  
42 495 26.Fu Q, Zhang Z, Hu W, et al. The correlation of triglyceride/high-density  
43  
44 496 lipoprotein cholesterol ratio with muscle mass in type 2 diabetes patients. *BMC*  
45  
46 497 *Endocr Disord*. 2023;23(1):93. doi: 10.1186/s12902-023-01349-8.  
47  
48  
49  
50  
51 498 27.Kim MK, Kwak I, Ki M, et al. Comparison of serum lipid levels among Korean,  
52  
53 499 Korean-Chinese, and Han-Chinese adolescents. *J Adolesc Health*.  
54  
55 500 2005;36(6):501-507. doi: 10.1016/j.jadohealth.2005.01.014.  
56  
57  
58  
59  
60



- 1  
2  
3  
4 501 28.Qiu S, Cai X, Yuan Y, et al. Muscle strength and prediabetes progression and  
5  
6  
7 502 regression in middle-aged and older adults: a prospective cohort study. *J Cachexia*  
8  
9 503 *Sarcopenia Muscle*. 2022;13(2):909-918. doi: 10.1002/jcsm.12905.  
10  
11  
12  
13 504 29.Du Y, Oh C, No J. Associations between Sarcopenia and Metabolic Risk Factors:  
14  
15 505 A Systematic Review and Meta-Analysis. *J Obes Metab Syndr*. 2018;27(3):175-185.  
16  
17  
18 506 doi: 10.7570/jomes.2018.27.3.1.  
19  
20  
21  
22 507 30.Bilgin S, Aktas G, Tel BMA, et al. Triglyceride to High Density Lipoprotein  
23  
24 508 Cholesterol Ratio is Elevated in Patients with Complicated Type 2 Diabetes Mellitus.  
25  
26  
27 509 *Acta facultatis medicae Naissensis*. 2022;39(1):66-73. DOI: 10.5937/afmnai39-33239.  
28  
29  
30  
31 510  
32  
33  
34 511  
35  
36  
37 512  
38  
39  
40  
41 513  
42  
43  
44  
45 514  
46  
47  
48 515  
49  
50  
51  
52 516  
53  
54  
55  
56 517  
57  
58  
59 518  
60

Table 1. Baseline characteristics of elderly patients with diabetes according to sarcopenia status in this study.

| Variables                                | Total (n=752)        | No sarcopenia (n=49) | Possible sarcopenia (n=557) | Sarcopenia (n=146)   | P-value          |
|------------------------------------------|----------------------|----------------------|-----------------------------|----------------------|------------------|
| Age (years)                              | 66.0 (62.5, 72.0)    | 64.0 (62.0, 68.0)    | 66.0 (62.0, 70.0)           | 70.0 (65.0, 75.0)    | <b>&lt;0.001</b> |
| >Median (vs. ≤median)                    |                      | 15 (30.6)            | 253 (45.4)                  | 97 (66.4)            | <b>&lt;0.001</b> |
| Gender (%)                               |                      |                      |                             |                      |                  |
| Female (vs. male)                        | 384 (51.1)           | 20 (40.8)            | 289 (51.9)                  | 75 (51.4)            | 0.330            |
| Handgrip strength (kg)                   |                      |                      |                             |                      |                  |
| Male                                     | 34.5 (28.5, 40.5)    | 41.5 (36.5, 45.0)    | 35.0 (29.8, 41.0)           | 29.0 (21.0, 33.5)    | <b>&lt;0.001</b> |
| Female                                   | 22.8 (18.0, 27.5)    | 27.8 (24.6, 32.3)    | 23.5 (18.5, 28.0)           | 19.8 (16.0, 23.0)    | <b>&lt;0.001</b> |
| Gait speed (m/s) <sup>a</sup>            | 0.66 (0.52, 0.79)    | 1.10 (1.04, 1.18)    | 0.64 (0.52, 0.78)           | 0.62 (0.49, 0.71)    | <b>&lt;0.001</b> |
| 5-time chair stand test (s) <sup>a</sup> | 10.5 (8.8, 13.2)     | 9.5 (6.9, 19.5)      | 10.3 (8.6, 13.0)            | 11.9 (9.6, 14.0)     | <b>&lt;0.001</b> |
| ASM/Ht <sup>2</sup> (kg/m <sup>2</sup> ) |                      |                      |                             |                      |                  |
| Male                                     | 7.61 (7.10, 8.16)    | 7.71 (7.47, 8.41)    | 7.84 (7.40, 8.24)           | 6.71 (6.44, 6.87)    | <b>&lt;0.001</b> |
| Female                                   | 5.89 (5.38, 6.55)    | 6.28 (5.55, 6.57)    | 6.16 (5.71, 6.72)           | 4.90 (4.67, 5.06)    | <b>&lt;0.001</b> |
| Residence (%)                            |                      |                      |                             |                      |                  |
| Rural (vs. urban)                        | 432 (57.4)           | 21 (42.9)            | 300 (53.9)                  | 111 (76.0)           | <b>&lt;0.001</b> |
| Education (%)                            |                      |                      |                             |                      |                  |
| Less than lower secondary                | 705 (93.8)           | 42 (85.7)            | 520 (93.4)                  | 143 (97.9)           |                  |
| Upper secondary or vocational training   | 28 (3.7)             | 3 (6.1)              | 23 (4.1)                    | 2 (1.4)              | <b>&lt;0.001</b> |
| Tertiary                                 | 19 (2.5)             | 4 (8.2)              | 14 (2.5)                    | 1 (0.7)              |                  |
| Ever/current smoke (%) <sup>a</sup>      | 303 (40.5)           | 21 (42.9)            | 220 (39.6)                  | 62 (43.1)            | 0.704            |
| Ever/current drinking (%) <sup>a</sup>   | 295 (39.5)           | 18 (36.7)            | 215 (38.8)                  | 62 (43.1)            | 0.598            |
| BMI (kg/m <sup>2</sup> )                 | 24.1 (21.6, 26.9)    | 24.4 (22.3, 26.9)    | 25.1 (23.0, 27.6)           | 19.4 (18.0, 20.3)    | <b>&lt;0.001</b> |
| Overweight (%)                           | 307 (40.8)           | 23 (46.9)            | 283 (50.8)                  | 1 (0.7)              | <b>&lt;0.001</b> |
| Blood pressure (mm Hg) <sup>a</sup>      |                      |                      |                             |                      |                  |
| Systolic                                 | 137.5 (124.0, 151.5) | 130.5 (124.0, 141.0) | 139.5 (124.5, 153.0)        | 135.3 (120.3, 149.3) | <b>0.014</b>     |

|                                     |                      |                      |                      |                      |                  |
|-------------------------------------|----------------------|----------------------|----------------------|----------------------|------------------|
| Diastolic                           | 75.5 (68.0, 82.5)    | 73.5 (68.0, 81.0)    | 76.0 (68.5, 83.5)    | 73.5 (63.8, 80.3)    | <b>0.006</b>     |
| Diabetes management (%)             |                      |                      |                      |                      |                  |
| Unawareness (vs. awareness)         | 447 (59.4)           | 27 (55.1)            | 308 (55.3)           | 112 (76.7)           | <b>&lt;0.001</b> |
| Untreatment (vs. treatment)         | 554 (73.7)           | 33 (67.3)            | 397 (71.3)           | 124 (84.9)           | <b>0.002</b>     |
| Plasma glucose (mg/dL) <sup>b</sup> | 140.1 (126.4, 176.0) | 137.9 (120.2, 164.7) | 141.1 (126.5, 177.8) | 138.2 (127.3, 173.5) | 0.665            |
| HbA1c (%)                           | 5.8 (5.2, 6.9)       | 6.1 (5.3, 7.2)       | 5.9 (5.3, 7.1)       | 5.5 (5.1, 6.2)       | <b>&lt;0.001</b> |
| TC (mg/dL)                          | 195.9 (168.2, 223.3) | 186.0 (160.8, 237.0) | 197.9 (170.9, 222.3) | 191.4 (160.8, 224.6) | 0.292            |
| TG (mg/dL)                          | 128.3 (89.4, 200.5)  | 147.8 (96.5, 232.8)  | 137.2 (97.4, 211.5)  | 102.2 (76.1, 143.4)  | <b>&lt;0.001</b> |
| LDL-C (mg/dL) <sup>a</sup>          | 115.2 (90.5, 139.9)  | 111.1 (88.7, 134.5)  | 116.4 (92.0, 141.1)  | 108.2 (85.8, 133.3)  | 0.198            |
| HDL-C (mg/dL)                       | 45.2 (37.1, 54.9)    | 41.4 (34.4, 49.9)    | 43.7 (37.1, 52.2)    | 52.6 (44.1, 63.4)    | <b>&lt;0.001</b> |
| hs-CRP (mg/L)                       | 1.47 (0.75, 3.47)    | 1.89 (0.84, 3.33)    | 1.53 (0.81, 3.50)    | 1.09 (0.64, 2.78)    | <b>0.018</b>     |
| Uric acid (mg/dL)                   | 4.61 (3.75, 5.57)    | 4.65 (3.78, 5.50)    | 4.71 (3.83, 5.62)    | 4.30 (3.50, 5.25)    | <b>0.003</b>     |
| eGFR (mL/min/1.73 m <sup>2</sup> )  | 85.5 (54.1, 95.4)    | 94.2 (70.9, 98.4)    | 84.3 (52.0, 95.2)    | 86.5 (59.4, 95.5)    | <b>0.013</b>     |
| TG/HDL-C                            | 2.81 (1.74, 5.20)    | 3.89 (1.92, 6.51)    | 3.05 (1.96, 5.61)    | 1.88 (1.15, 3.09)    | <b>&lt;0.001</b> |
| Quartile 1 ( $\leq 1.73$ )          |                      | 9 (18.4)             | 115 (20.6)           | 64 (43.8)            |                  |
| Quartile 2 (1.74-2.81)              |                      | 10 (20.4)            | 139 (25.0)           | 39 (26.7)            |                  |
| Quartile 3 (2.82-5.19)              |                      | 15 (30.6)            | 148 (26.6)           | 25 (17.1)            | <b>&lt;0.001</b> |
| Quartile 4 ( $> 5.19$ )             |                      | 15 (30.6)            | 155 (27.8)           | 18 (12.3)            |                  |

Data are shown as means  $\pm$  standard deviation, median (interquartile range), or numbers (percentages).

a. Missing data: 38 for gait speed, 43 for 5-time chair stand test, 3 for history of smoking, 5 for history of drinking, 14 for blood pressure and 5 for LDL-C.

b. Among the measurements of plasma glucose, 39 participants were non-fasting.

Abbreviations: ASM/Ht<sup>2</sup>: the height-adjusted muscle mass; BMI: the body mass index; HbA1c: glycated hemoglobin; TC: total cholesterol; TG: triglyceride; LDL-C: low-density lipoprotein cholesterol; HDL-C: high-density lipoprotein cholesterol ratio; hs-CRP: high-sensitivity C-reactive protein; eGFR: the estimated glomerular filtration rate; TG/HDL-C: triglyceride to high-density lipoprotein cholesterol ratio.

Table 2. Baseline characteristics of male elderly patients with diabetes according to sarcopenia status in this study.

| Variables                                | Total (n=368)        | No sarcopenia (n=29) | Possible sarcopenia (n=268) | Sarcopenia (n=71)    | P-value          |
|------------------------------------------|----------------------|----------------------|-----------------------------|----------------------|------------------|
| Age (years)                              | 66.0 (62.0, 72.0)    | 64.0 (62.0, 68.0)    | 65.0 (62.0, 70.0)           | 71.0 (65.0, 77.0)    | <b>&lt;0.001</b> |
| >Median (vs. ≤median)                    |                      | 10 (34.5)            | 113 (42.2)                  | 47 (66.2)            | <b>0.001</b>     |
| Handgrip strength (kg)                   | 34.5 (28.5, 40.5)    | 41.5 (36.5, 45.0)    | 35.0 (29.8, 41.0)           | 29.0 (21.0, 33.5)    | <b>&lt;0.001</b> |
| Gait speed (m/s) <sup>a</sup>            | 0.66 (0.52, 0.79)    | 1.10 (1.04, 1.18)    | 0.64 (0.52, 0.78)           | 0.62 (0.49, 0.71)    | <b>&lt;0.001</b> |
| 5-time chair stand test (s) <sup>a</sup> | 10.5 (8.8, 13.2)     | 9.5 (6.9, 19.5)      | 10.3 (8.6, 13.0)            | 11.9 (9.6, 14.0)     | <b>&lt;0.001</b> |
| ASM/Ht <sup>2</sup> (kg/m <sup>2</sup> ) | 7.61 (7.10, 8.16)    | 7.71 (7.47, 8.41)    | 7.84 (7.40, 8.24)           | 6.71 (6.44, 6.87)    | <b>&lt;0.001</b> |
| Residence (%)                            |                      |                      |                             |                      |                  |
| Rural (vs. urban)                        | 218 (59.2)           | 16 (55.2)            | 146 (54.5)                  | 56 (78.9)            | <b>0.001</b>     |
| Education (%)                            |                      |                      |                             |                      |                  |
| Less than lower secondary                | 338 (91.8)           | 25 (86.3)            | 244 (91.0)                  | 69 (97.2)            |                  |
| Upper secondary or vocational training   | 15 (4.1)             | 1 (3.4)              | 12 (4.5)                    | 2 (2.8)              | 0.119            |
| Tertiary                                 | 15 (4.1)             | 3 (10.3)             | 12 (4.5)                    | 0 (0)                |                  |
| Ever/current smoke (%) <sup>a</sup>      | 270 (73.8)           | 20 (69.0)            | 194 (72.7)                  | 56 (80.0)            | 0.384            |
| Ever/current drinking (%) <sup>a</sup>   | 236 (64.7)           | 18 (62.1)            | 165 (62.0)                  | 53 (75.7)            | 0.099            |
| BMI (kg/m <sup>2</sup> )                 | 23.7 (21.1, 26.2)    | 24.2 (22.3, 27.8)    | 24.6 (22.5, 26.8)           | 19.1 (17.8, 19.9)    | <b>&lt;0.001</b> |
| Overweight (%)                           | 131 (35.6)           | 12 (41.4)            | 119 (44.4)                  | 0 (0)                | <b>&lt;0.001</b> |
| Blood pressure (mm Hg) <sup>a</sup>      |                      |                      |                             |                      |                  |
| Systolic                                 | 135.5 (124.5, 147.0) | 130.0 (124.0, 136.0) | 138.0 (125.0, 149.5)        | 132.5 (121.0, 145.0) | <b>0.011</b>     |
| Diastolic                                | 75.5 (68.5, 82.5)    | 74.0 (68.5, 81.0)    | 76.5 (70.0, 83.5)           | 73.5 (63.5, 79.0)    | <b>0.007</b>     |
| Diabetes management (%)                  |                      |                      |                             |                      |                  |
| Unawareness (vs. awareness)              | 229 (62.2)           | 15 (51.7)            | 161 (60.1)                  | 53 (74.6)            | <b>0.038</b>     |
| Untreatment (vs. treatment)              | 274 (74.5)           | 18 (62.1)            | 197 (73.5)                  | 59 (83.1)            | 0.072            |
| Plasma glucose (mg/dL) <sup>b</sup>      | 138.7 (126.4, 175.2) | 139.9 (126.4, 197.5) | 139.1 (126.4, 175.2)        | 137.3 (126.4, 175.0) | 0.763            |
| HbA1c (%)                                | 5.6 (5.1, 6.9)       | 6.2 (5.3, 7.7)       | 5.6 (5.2, 7.1)              | 5.3 (5.0, 5.9)       | <b>0.007</b>     |

|                                    |                      |                      |                      |                      |                  |
|------------------------------------|----------------------|----------------------|----------------------|----------------------|------------------|
| TC (mg/dL)                         | 186.5 (160.8, 213.2) | 174.4 (156.6, 190.3) | 190.8 (165.5, 216.1) | 171.7 (149.2, 202.6) | <b>0.006</b>     |
| TG (mg/dL)                         | 111.1 (78.8, 172.1)  | 121.2 (82.3, 187.6)  | 115.1 (82.3, 185.0)  | 88.5 (67.3, 130.1)   | <b>0.001</b>     |
| LDL-C (mg/dL) <sup>a</sup>         | 109.1±35.4           | 108.3±30.6           | 111.9±36.2           | 98.9±32.5            | <b>0.002</b>     |
| HDL-C (mg/dL)                      | 45.6 (37.1, 57.2)    | 40.6 (33.2, 48.3)    | 44.7 (34.6, 55.1)    | 53.0 (44.1, 66.9)    | <b>&lt;0.001</b> |
| hs-CRP (mg/L)                      | 1.33 (0.72, 3.13)    | 1.80 (0.77, 4.00)    | 1.38 (0.73, 3.01)    | 1.10 (0.68, 3.68)    | 0.470            |
| Uric acid (mg/dL)                  | 4.88 (4.08, 5.85)    | 4.27 (3.73, 5.20)    | 4.99 (4.19, 6.00)    | 4.70 (3.91, 5.40)    | <b>0.024</b>     |
| eGFR (mL/min/1.73 m <sup>2</sup> ) | 88.9 (74.0, 96.3)    | 94.2 (73.9, 99.2)    | 88.1 (74.3, 95.9)    | 88.9 (72.8, 95.7)    | 0.349            |
| TG/HDL-C                           | 2.35 (1.41, 4.71)    | 3.73 (1.91, 6.51)    | 2.55 (1.59, 4.97)    | 1.49 (1.10, 2.48)    | <b>&lt;0.001</b> |
| Quartile 1 (≤1.41)                 |                      | 4 (13.8)             | 56 (20.9)            | 32 (45.1)            |                  |
| Quartile 2 (1.42-2.35)             |                      | 6 (20.7)             | 67 (25.0)            | 19 (26.8)            |                  |
| Quartile 3 (2.36-4.71)             |                      | 8 (27.6)             | 69 (25.7)            | 15 (21.1)            |                  |
| Quartile 4 (>4.71)                 |                      | 11 (37.9)            | 76 (28.4)            | 5 (7.0)              | <b>&lt;0.001</b> |

Data are shown as means ± standard deviation, median (interquartile range), or numbers (percentages).

a. Missing data: 15 for gait speed, 11 for 5-time chair stand test, 2 for history of smoking, 3 for history of drinking, 5 for blood pressure and 1 for LDL-C.

b. Among the measurements of plasma glucose, 17 male participants were non-fasting.

Abbreviations: ASM/Ht<sup>2</sup>: the height-adjusted muscle mass; BMI: the body mass index; HbA1c: glycated hemoglobin; TC: total cholesterol; TG: triglyceride; LDL-C: low-density lipoprotein cholesterol; HDL-C: high-density lipoprotein cholesterol ratio; hs-CRP: high-sensitivity C-reactive protein; eGFR: the estimated glomerular filtration rate; TG/HDL-C: triglyceride to high-density lipoprotein cholesterol ratio.

Table 3. Baseline characteristics of female elderly patients with diabetes according to sarcopenia status in this study.

| Variables                                | Total (n=384)        | No sarcopenia (n=20) | Possible sarcopenia (n=289) | Sarcopenia (n=75)    | P-value          |
|------------------------------------------|----------------------|----------------------|-----------------------------|----------------------|------------------|
| Age (years)                              | 67.0 (63.0, 71.5)    | 63.0 (61.0, 66.5)    | 66.0 (62.0, 71.0)           | 69.0 (65.0, 75.0)    | <b>&lt;0.001</b> |
| >Median (vs. ≤median)                    |                      | 4 (20.0)             | 122 (42.2)                  | 40 (53.3)            | <b>0.021</b>     |
| Handgrip strength (kg)                   | 22.8 (18.0, 27.5)    | 27.8 (24.6, 32.3)    | 23.5 (18.5, 28.0)           | 19.8 (16.0, 23.0)    | <b>&lt;0.001</b> |
| Gait speed (m/s) <sup>a</sup>            | 0.63 (0.47, 0.76)    | 1.10 (1.03, 1.17)    | 0.63 (0.47, 0.75)           | 0.58 (0.46, 0.69)    | <b>&lt;0.001</b> |
| 5-time chair stand test (s) <sup>a</sup> | 11.3 (9.1, 14.5)     | 7.9 (7.3, 8.7)       | 11.6 (9.4, 14.8)            | 11.4 (9.4, 14.7)     | <b>&lt;0.001</b> |
| ASM/Ht <sup>2</sup> (kg/m <sup>2</sup> ) | 5.89 (5.38, 6.55)    | 6.28 (5.55, 6.57)    | 6.16 (5.71, 6.72)           | 4.90 (4.67, 5.06)    | <b>&lt;0.001</b> |
| Residence (%)                            |                      |                      |                             |                      |                  |
| Rural (vs. urban)                        | 214 (55.7)           | 5 (25.0)             | 154 (53.3)                  | 55 (73.3)            | <b>&lt;0.001</b> |
| Education (%)                            |                      |                      |                             |                      |                  |
| Less than lower secondary                | 367 (95.6)           | 17 (85.0)            | 276 (95.5)                  | 74 (98.7)            |                  |
| Upper secondary or vocational training   | 13 (3.4)             | 2 (10.0)             | 11 (3.8)                    | 0 (0)                | <b>0.032</b>     |
| Tertiary                                 | 4 (1.0)              | 1 (5.0)              | 2 (0.7)                     | 1 (1.3)              |                  |
| Ever/current smoke (%) <sup>a</sup>      | 33 (8.6)             | 1 (5.0)              | 26 (9.0)                    | 6 (8.1)              | 1.000            |
| Ever/current drinking (%) <sup>a</sup>   | 59 (15.4)            | 0 (0)                | 50 (17.4)                   | 9 (12.2)             | 0.068            |
| BMI (kg/m <sup>2</sup> )                 | 24.7 (22.0, 27.6)    | 25.5 (22.2, 26.4)    | 25.6 (23.5, 28.0)           | 19.7 (18.6, 20.9)    | <b>&lt;0.001</b> |
| Overweight (%)                           | 176 (45.8)           | 11 (55.0)            | 164 (56.7)                  | 1 (1.3)              | <b>&lt;0.001</b> |
| Blood pressure (mm Hg) <sup>a</sup>      |                      |                      |                             |                      |                  |
| Systolic                                 | 140.0 (123.5, 155.0) | 133.3 (126.0, 150.5) | 140.5 (124.0, 155.5)        | 138.0 (119.0, 154.5) | 0.621            |
| Diastolic                                | 75.5 (67.0, 83.0)    | 73.0 (67.5, 82.5)    | 76.0 (67.5, 83.5)           | 74.5 (65.0, 80.5)    | 0.337            |
| Diabetes management (%)                  |                      |                      |                             |                      |                  |
| Unawareness (vs. awareness)              | 218 (56.8)           | 12 (60.0)            | 147 (50.9)                  | 59 (78.7)            | <b>&lt;0.001</b> |
| Untreatment (vs. treatment)              | 280 (72.9)           | 15 (75.0)            | 200 (69.2)                  | 65 (86.7)            | <b>0.008</b>     |
| Plasma glucose (mg/dL) <sup>b</sup>      | 141.2 (126.5, 177.7) | 134.2 (106.0, 160.3) | 142.7 (127.1, 179.8)        | 138.2 (127.6, 173.2) | 0.205            |
| HbA1c (%)                                | 6.0 (5.4, 6.9)       | 5.9 (5.3, 7.0)       | 6.1 (5.5, 7.1)              | 5.6 (5.2, 6.5)       | <b>0.002</b>     |

1  
2  
3  
4  
5  
6  
7  
8  
9  
10  
11  
12  
13  
14  
15  
16  
17  
18  
19  
20  
21  
22  
23  
24  
25  
26  
27  
28  
29  
30  
31  
32  
33  
34  
35  
36  
37  
38  
39  
40  
41  
42  
43  
44  
45  
46

|                                    |                      |                      |                      |                      |                  |
|------------------------------------|----------------------|----------------------|----------------------|----------------------|------------------|
| TC (mg/dL)                         | 205.5 (178.6, 230.5) | 233.8 (178.1, 259.1) | 204.9 (176.7, 229.3) | 208.4 (184.4, 236.2) | 0.389            |
| TG (mg/dL)                         | 146.5 (106.2, 222.1) | 164.6 (135.4, 250.9) | 152.2 (112.4, 229.2) | 108.0 (80.5, 162.8)  | <b>&lt;0.001</b> |
| LDL-C (mg/dL) <sup>a</sup>         | 122.0±40.5           | 129.6±44.0           | 120.9±41.4           | 124.3±36.3           | 0.629            |
| HDL-C (mg/dL)                      | 45.2 (37.5, 53.0)    | 43.9 (37.7, 52.6)    | 42.9 (37.1, 51.4)    | 52.2 (43.3, 62.6)    | <b>&lt;0.001</b> |
| hs-CRP (mg/L)                      | 1.60 (0.80, 3.53)    | 1.95 (1.02, 2.78)    | 1.73 (0.90, 3.80)    | 1.08 (0.59, 2.60)    | <b>0.009</b>     |
| Uric acid (mg/dL)                  | 4.33 (3.58, 5.21)    | 5.22 (3.88, 6.01)    | 4.35 (3.67, 5.24)    | 3.78 (3.25, 4.74)    | <b>0.001</b>     |
| eGFR (mL/min/1.73 m <sup>2</sup> ) | 62.7 (45.5, 95.0)    | 93.4 (52.9, 97.4)    | 57.1 (45.2, 93.9)    | 84.7 (45.5, 95.5)    | 0.090            |
| TG/HDL-C                           | 3.26 (2.07, 5.61)    | 4.06 (2.63, 6.62)    | 3.45 (2.35, 5.99)    | 2.02 (1.20, 4.27)    | <b>&lt;0.001</b> |
| Quartile 1 (≤2.07)                 | 95 (24.7)            | 4 (20.0)             | 51 (17.6)            | 40 (53.3)            |                  |
| Quartile 2 (2.08-3.26)             | 98 (25.5)            | 4 (20.0)             | 82 (28.4)            | 12 (16.0)            |                  |
| Quartile 3 (3.27-5.61)             | 95 (24.7)            | 6 (30.0)             | 74 (25.6)            | 15 (20.0)            | <b>&lt;0.001</b> |
| Quartile 4 (>5.61)                 | 96 (25.0)            | 6 (30.0)             | 82 (28.4)            | 8 (10.7)             |                  |

Data are shown as means ± standard deviation, median (interquartile range), or numbers (percentages).

a. Missing data: 23 for gait speed, 32 for 5-time chair stand test, 1 for history of smoking, 2 for history of drinking, 9 for blood pressure and 4 for LDL-C.

b. Among the measurements of plasma glucose, 22 female participants were non-fasting.

Abbreviations: ASM/Ht<sup>2</sup> : the height-adjusted muscle mass; BMI: the body mass index; HbA1c: glycated hemoglobin; TC: total cholesterol; TG: triglyceride; LDL-C: low-density lipoprotein cholesterol; HDL-C: high-density lipoprotein cholesterol ratio; hs-CRP: high-sensitivity C-reactive protein; eGFR: the estimated glomerular filtration rate; TG/HDL-C: triglyceride to high-density lipoprotein cholesterol ratio.

Table 4. Association between TG/HDL-C and sarcopenia status in elderly patients with diabetes in ordinal logistic regression analysis.

| Variables                  | Male                    |                                |                      | OR (95% CI)                 |                             |                             |                             |
|----------------------------|-------------------------|--------------------------------|----------------------|-----------------------------|-----------------------------|-----------------------------|-----------------------------|
|                            | No sarcopenia<br>(n=29) | Possible sarcopenia<br>(n=268) | Sarcopenia<br>(n=71) | Model 1 <sup>a</sup>        | Model 2 <sup>b</sup>        | Model 3 <sup>c</sup>        | Model 4 <sup>d</sup>        |
|                            | TG/HDL-C                |                                |                      |                             |                             |                             |                             |
| Quartile 1 ( $\leq 1.41$ ) | 4 (13.8)                | 56 (20.9)                      | 32 (45.1)            | Reference                   | Reference                   | Reference                   | Reference                   |
| Quartile 2 (1.42-2.35)     | 6 (20.7)                | 67 (25.0)                      | 19 (26.8)            | <b>0.49 (0.26, 0.92)*</b>   | <b>0.47 (0.25, 0.88)*</b>   | <b>0.50 (0.26, 0.96)*</b>   | <b>0.48 (0.24, 0.97)*</b>   |
| Quartile 3 (2.36-4.71)     | 8 (27.6)                | 69 (25.7)                      | 15 (21.1)            | <b>0.36 (0.19, 0.69)**</b>  | <b>0.33 (0.17, 0.65)**</b>  | <b>0.41 (0.20, 0.80)**</b>  | 0.56 (0.27, 1.17)           |
| Quartile 4 ( $> 4.71$ )    | 11 (37.9)               | 76 (28.4)                      | 5 (7.0)              | <b>0.18 (0.09, 0.35)***</b> | <b>0.18 (0.09, 0.37)***</b> | <b>0.24 (0.12, 0.49)***</b> | <b>0.24 (0.10, 0.54)**</b>  |
| Variables                  | Female                  |                                |                      | OR (95% CI)                 |                             |                             |                             |
|                            | No sarcopenia<br>(n=20) | Possible sarcopenia<br>(n=289) | Sarcopenia<br>(n=75) | Model 1 <sup>a</sup>        | Model 2 <sup>b</sup>        | Model 3 <sup>c</sup>        | Model 4 <sup>d</sup>        |
|                            | TG/HDL-C                |                                |                      |                             |                             |                             |                             |
| Quartile 1 ( $\leq 2.07$ ) | 4 (20.0)                | 51 (17.6)                      | 40 (53.3)            | Reference                   | Reference                   | Reference                   | Reference                   |
| Quartile 2 (2.08-3.26)     | 4 (20.0)                | 82 (28.4)                      | 12 (16.0)            | <b>0.24 (0.12, 0.46)***</b> | <b>0.23 (0.12, 0.45)***</b> | <b>0.28 (0.14, 0.56)***</b> | <b>0.38 (0.17, 0.83)*</b>   |
| Quartile 3 (3.27-5.61)     | 6 (30.0)                | 74 (25.6)                      | 15 (20.0)            | <b>0.36 (0.13, 0.50)***</b> | <b>0.25 (0.13, 0.49)***</b> | <b>0.26 (0.13, 0.50)***</b> | <b>0.26 (0.12, 0.57)**</b>  |
| Quartile 4 ( $> 5.61$ )    | 6 (30.0)                | 82 (28.4)                      | 8 (10.7)             | <b>0.17 (0.08, 0.33)***</b> | <b>0.17 (0.09, 0.34)***</b> | <b>0.18 (0.09, 0.37)***</b> | <b>0.17 (0.07, 0.44)***</b> |

a. Unadjusted.

b. Adjusted for median age.

c. Adjusted for median age, residence, education level, and history of smoking and drinking.

d. Adjusted for median age, residence, education level, and history of smoking and drinking, overweight, diabetes management, SBP, DBP, plasma glucose, HbA1c, TC, LDL-C, hs-CRP, uric acid, and eGFR.

\*  $P < 0.05$ ; \*\*  $P < 0.01$ ; \*\*\*  $P < 0.001$ .

Abbreviations: TG/HDL-C: triglyceride to high-density lipoprotein cholesterol ratio; OR: odds ratio; 95% CI: 95% confidence interval; SBP: systolic blood pressure; DBP: diastolic blood pressure; HbA1c: glycated hemoglobin; TC: total cholesterol; LDL-C: low-density lipoprotein cholesterol; hs-CRP: high-sensitivity C-reactive protein; eGFR: the estimated glomerular filtration rate.



Table 5. Associations between TG/HDL-C and muscle strength, physical performance, and muscle mass in elderly patients with diabetes in linear regression analysis.

| Variables                                | Male                       |                                             | Female                                   |                            |                                             |
|------------------------------------------|----------------------------|---------------------------------------------|------------------------------------------|----------------------------|---------------------------------------------|
|                                          | $\beta$ (95% CI)           |                                             | $\beta$ (95% CI)                         |                            |                                             |
|                                          | Simple linear regression   | Multivariate linear regression <sup>a</sup> | Variables                                | Simple linear regression   | Multivariate linear regression <sup>a</sup> |
| Handgrip strength (kg)                   |                            |                                             | Handgrip strength (kg)                   |                            |                                             |
| TG/HDL-C                                 |                            |                                             | TG/HDL-C                                 |                            |                                             |
| Quartile 1 ( $\leq 1.41$ )               | Reference                  | Reference                                   | Quartile 1 ( $\leq 2.07$ )               | Reference                  | Reference                                   |
| Quartile 2 (1.42-2.35)                   | -0.69 (-3.32, 1.93)        | -0.88 (-3.47, 1.71)                         | Quartile 2 (2.08-3.26)                   | 1.67 (-0.70, 4.04)         | 1.50 (-1.09, 4.09)                          |
| Quartile 3 (2.36-4.71)                   | 1.05 (-1.58, 3.68)         | -0.05 (-2.78, 2.67)                         | Quartile 3 (3.27-5.61)                   | 1.28 (-1.10, 3.67)         | 1.77 (-0.80, 4.34)                          |
| Quartile 4 ( $> 4.71$ )                  | 2.23 (-0.40, 4.86)         | -0.92 (-3.84, 2.00)                         | Quartile 4 ( $> 5.61$ )                  | <b>3.16 (0.78, 5.54)**</b> | <b>3.93 (0.89, 6.97)*</b>                   |
| Gait speed (m/s)                         |                            |                                             | Gait speed (m/s)                         |                            |                                             |
| TG/HDL-C                                 |                            |                                             | TG/HDL-C                                 |                            |                                             |
| Quartile 1 ( $\leq 1.41$ )               | Reference                  | Reference                                   | Quartile 1 ( $\leq 2.07$ )               | Reference                  | Reference                                   |
| Quartile 2 (1.42-2.35)                   | -0.017 (-0.089, 0.056)     | 0.001 (-0.074, 0.076)                       | Quartile 2 (2.08-3.26)                   | 0.025 (-0.039, 0.089)      | 0.008 (-0.059, 0.075)                       |
| Quartile 3 (2.36-4.71)                   | -0.072 (-1.452, 0.001)     | -0.046 (-0.126, 0.033)                      | Quartile 3 (3.27-5.61)                   | 0.009 (-0.056, 0.074)      | 0.013 (-0.054, 0.079)                       |
| Quartile 4 ( $> 4.71$ )                  | 0.009 (-0.064, 0.081)      | 0.015 (-0.070, 0.100)                       | Quartile 4 ( $> 5.61$ )                  | 0.047 (-0.018, 0.113)      | 0.060 (-0.020, 0.139)                       |
| 5-time chair stand test (s)              |                            |                                             | 5-time chair stand test (s)              |                            |                                             |
| TG/HDL-C                                 |                            |                                             | TG/HDL-C                                 |                            |                                             |
| Quartile 1 ( $\leq 1.41$ )               | Reference                  | Reference                                   | Quartile 1 ( $\leq 2.07$ )               | Reference                  | Reference                                   |
| Quartile 2 (1.42-2.35)                   | 1.03 (-0.22, 2.27)         | 1.09 (-0.16, 2.33)                          | Quartile 2 (2.08-3.26)                   | 0.16 (-1.34, 1.65)         | -0.13 (-1.73, 1.47)                         |
| Quartile 3 (2.36-4.71)                   | 0.95 (-0.30, 2.20)         | 1.04 (-0.29, 2.36)                          | Quartile 3 (3.27-5.61)                   | 0.51 (-1.01, 2.03)         | -0.13 (-1.71, 1.46)                         |
| Quartile 4 ( $> 4.71$ )                  | <b>1.54 (0.30, 2.78)**</b> | <b>2.60 (1.19, 4.00)***</b>                 | Quartile 4 ( $> 5.61$ )                  | -0.41 (-1.93, 1.10)        | -0.50 (-2.37, 1.36)                         |
| ASM/Ht <sup>2</sup> (kg/m <sup>2</sup> ) |                            |                                             | ASM/Ht <sup>2</sup> (kg/m <sup>2</sup> ) |                            |                                             |
| TG/HDL-C                                 |                            |                                             | TG/HDL-C                                 |                            |                                             |
| Quartile 1 ( $\leq 1.41$ )               | Reference                  | Reference                                   | Quartile 1 ( $\leq 2.07$ )               | Reference                  | Reference                                   |

|                        |                             |                             |                        |                             |                            |
|------------------------|-----------------------------|-----------------------------|------------------------|-----------------------------|----------------------------|
| Quartile 2 (1.42-2.35) | <b>0.24 (0.15, 0.47)*</b>   | <b>0.18 (0.04, 0.32)**</b>  | Quartile 2 (2.08-3.26) | <b>0.65 (0.41, 0.88)***</b> | <b>0.30 (0.12, 0.47)**</b> |
| Quartile 3 (2.36-4.71) | <b>0.58 (0.36, 0.81)***</b> | <b>0.18 (0.03, 0.32)*</b>   | Quartile 3 (3.27-5.61) | <b>0.59 (0.35, 0.82)***</b> | <b>0.28 (0.11, 0.45)**</b> |
| Quartile 4 (>4.71)     | <b>0.81 (0.59, 1.04)***</b> | <b>0.36 (0.20, 0.51)***</b> | Quartile 4 (>5.61)     | <b>0.67 (0.43, 0.90)***</b> | <b>0.31 (0.10, 0.51)**</b> |

a. Adjusted for median age, residence, education level, and history of smoking and drinking, overweight, diabetes management, SBP, DBP, plasma glucose, HbA1c, TC, LDL-C, hs-CRP, uric acid, and eGFR.

\*  $P < 0.05$ ; \*\*  $P < 0.01$ ; \*\*\*  $P < 0.001$ .

Abbreviations: TG/HDL-C: triglyceride to high-density lipoprotein cholesterol ratio; 95% CI: 95% confidence interval; ASM/Ht<sup>2</sup>: the height-adjusted muscle mass; SBP: systolic blood pressure; DBP: diastolic blood pressure; HbA1c: glycated hemoglobin; TC: total cholesterol; LDL-C: low-density lipoprotein cholesterol; hs-CRP: high-sensitivity C-reactive protein; eGFR: the estimated glomerular filtration rate.

STROBE Statement—Checklist of items that should be included in reports of *cohort studies*

|                              | Item No | Recommendation                                                                                                                                                                                    | Page No  |
|------------------------------|---------|---------------------------------------------------------------------------------------------------------------------------------------------------------------------------------------------------|----------|
| <b>Title and abstract</b>    | 1       | (a) Indicate the study's design with a commonly used term in the title or the abstract<br>(b) Provide in the abstract an informative and balanced summary of what was done and what was found     | 1<br>2-4 |
| <b>Introduction</b>          |         |                                                                                                                                                                                                   |          |
| Background/rationale         | 2       | Explain the scientific background and rationale for the investigation being reported                                                                                                              | 5-6      |
| Objectives                   | 3       | State specific objectives, including any prespecified hypotheses                                                                                                                                  | 6        |
| <b>Methods</b>               |         |                                                                                                                                                                                                   |          |
| Study design                 | 4       | Present key elements of study design early in the paper                                                                                                                                           | 6-11     |
| Setting                      | 5       | Describe the setting, locations, and relevant dates, including periods of recruitment, exposure, follow-up, and data collection                                                                   | 6-11     |
| Participants                 | 6       | (a) Give the eligibility criteria, and the sources and methods of selection of participants. Describe methods of follow-up                                                                        | 6-11     |
|                              |         | (b) For matched studies, give matching criteria and number of exposed and unexposed                                                                                                               | 6-11     |
| Variables                    | 7       | Clearly define all outcomes, exposures, predictors, potential confounders, and effect modifiers. Give diagnostic criteria, if applicable                                                          | 6-11     |
| Data sources/<br>measurement | 8*      | For each variable of interest, give sources of data and details of methods of assessment (measurement). Describe comparability of assessment methods if there is more than one group              | 6-11     |
| Bias                         | 9       | Describe any efforts to address potential sources of bias                                                                                                                                         | 6-11     |
| Study size                   | 10      | Explain how the study size was arrived at                                                                                                                                                         | 6-11     |
| Quantitative variables       | 11      | Explain how quantitative variables were handled in the analyses. If applicable, describe which groupings were chosen and why                                                                      | 6-11     |
| Statistical methods          | 12      | (a) Describe all statistical methods, including those used to control for confounding                                                                                                             | 6-11     |
|                              |         | (b) Describe any methods used to examine subgroups and interactions                                                                                                                               | 6-11     |
|                              |         | (c) Explain how missing data were addressed                                                                                                                                                       | 6-11     |
|                              |         | (d) If applicable, explain how loss to follow-up was addressed                                                                                                                                    | 6-11     |
|                              |         | (e) Describe any sensitivity analyses                                                                                                                                                             | 6-11     |
| <b>Results</b>               |         |                                                                                                                                                                                                   |          |
| Participants                 | 13*     | (a) Report numbers of individuals at each stage of study—eg numbers potentially eligible, examined for eligibility, confirmed eligible, included in the study, completing follow-up, and analysed | 11-15    |
|                              |         | (b) Give reasons for non-participation at each stage                                                                                                                                              | 11-15    |
|                              |         | (c) Consider use of a flow diagram                                                                                                                                                                | 11-15    |
| Descriptive data             | 14*     | (a) Give characteristics of study participants (eg demographic, clinical, social) and information on exposures and potential confounders                                                          | 11-15    |
|                              |         | (b) Indicate number of participants with missing data for each variable of interest                                                                                                               | 11-15    |
|                              |         | (c) Summarise follow-up time (eg, average and total amount)                                                                                                                                       | 11-15    |
| Outcome data                 | 15*     | Report numbers of outcome events or summary measures over time                                                                                                                                    | 11-15    |

|    |                          |    |                                                                                                                                                                                                              |       |
|----|--------------------------|----|--------------------------------------------------------------------------------------------------------------------------------------------------------------------------------------------------------------|-------|
| 1  | Main results             | 16 | (a) Give unadjusted estimates and, if applicable, confounder-adjusted estimates and their precision (eg, 95% confidence interval). Make clear which confounders were adjusted for and why they were included | 11-15 |
| 2  |                          |    | (b) Report category boundaries when continuous variables were categorized                                                                                                                                    | 11-15 |
| 3  |                          |    | (c) If relevant, consider translating estimates of relative risk into absolute risk for a meaningful time period                                                                                             | 11-15 |
| 4  |                          |    |                                                                                                                                                                                                              |       |
| 5  | Other analyses           | 17 | Report other analyses done—eg analyses of subgroups and interactions, and sensitivity analyses                                                                                                               | 11-15 |
| 6  |                          |    |                                                                                                                                                                                                              |       |
| 7  |                          |    |                                                                                                                                                                                                              |       |
| 8  |                          |    |                                                                                                                                                                                                              |       |
| 9  |                          |    |                                                                                                                                                                                                              |       |
| 10 |                          |    |                                                                                                                                                                                                              |       |
| 11 | <b>Discussion</b>        |    |                                                                                                                                                                                                              |       |
| 12 | Key results              | 18 | Summarise key results with reference to study objectives                                                                                                                                                     | 15-20 |
| 13 | Limitations              | 19 | Discuss limitations of the study, taking into account sources of potential bias or imprecision. Discuss both direction and magnitude of any potential bias                                                   | 19    |
| 14 |                          |    |                                                                                                                                                                                                              |       |
| 15 | Interpretation           | 20 | Give a cautious overall interpretation of results considering objectives, limitations, multiplicity of analyses, results from similar studies, and other relevant evidence                                   | 15-20 |
| 16 |                          |    |                                                                                                                                                                                                              |       |
| 17 | Generalisability         | 21 | Discuss the generalisability (external validity) of the study results                                                                                                                                        | 20    |
| 18 |                          |    |                                                                                                                                                                                                              |       |
| 19 |                          |    |                                                                                                                                                                                                              |       |
| 20 |                          |    |                                                                                                                                                                                                              |       |
| 21 | <b>Other information</b> |    |                                                                                                                                                                                                              |       |
| 22 | Funding                  | 22 | Give the source of funding and the role of the funders for the present study and, if applicable, for the original study on which the present article is based                                                | 20    |
| 23 |                          |    |                                                                                                                                                                                                              |       |
| 24 |                          |    |                                                                                                                                                                                                              |       |

\*Give information separately for exposed and unexposed groups.

**Note:** An Explanation and Elaboration article discusses each checklist item and gives methodological background and published examples of transparent reporting. The STROBE checklist is best used in conjunction with this article (freely available on the Web sites of PLoS Medicine at <http://www.plosmedicine.org/>, Annals of Internal Medicine at <http://www.annals.org/>, and Epidemiology at <http://www.epidem.com/>). Information on the STROBE Initiative is available at <http://www.strobe-statement.org>.
